# Supplementary material
Source: PubMed Central journal article supplement (PMC8617499)
Supplement: pnas.2105574118.sapp.pdf [file pnas.2105574118.sapp.pdf]

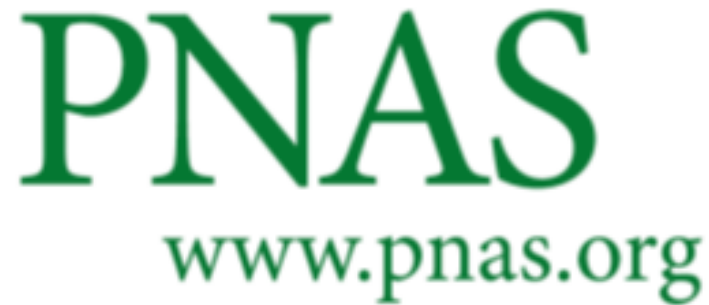

**Supporting Information for:  
Emergent dual scaling of riverine biodiversity**

Akira Terui<sup>\*,1</sup>, Seoghyun Kim<sup>1</sup>, Christine L. Dolph<sup>2</sup>, Taku Kadoya<sup>3</sup>, Yusuke Miyazaki<sup>4</sup>

\*Corresponding author

Email: hanabi0111@gmail.com

<sup>1</sup> Department of Biology, University of North Carolina at Greensboro, Greensboro, NC 27412, USA

<sup>2</sup> Department of Ecology, Evolution and Behavior, University of Minnesota, St. Paul, MN 55108, USA

<sup>3</sup> National Institute for Environmental Studies, Tsukuba, Ibaraki 305-8506, Japan

<sup>4</sup> Shiraume Gakuen College, Kodaira, Tokyo 187-8570, Japan

**This PDF file includes:**

- Supplementary text
- Tables S1 - S7
- Figures S1 - S20
- SI References

# Contents

|                                                                                                            |           |
|------------------------------------------------------------------------------------------------------------|-----------|
| <b>Theory</b>                                                                                              | <b>1</b>  |
| Sensitivity analysis . . . . .                                                                             | 1         |
| Longitudinal gradient of local species richness . . . . .                                                  | 1         |
| <b>Empirical data</b>                                                                                      | <b>2</b>  |
| Data selection criteria . . . . .                                                                          | 2         |
| Asymptotic species richness . . . . .                                                                      | 3         |
| Average predictive comparison . . . . .                                                                    | 3         |
| <b>Tables</b>                                                                                              | <b>6</b>  |
| Table S1 Simulation parameter (sensitivity analysis) . . . . .                                             | 6         |
| Table S2 Simulation parameter (main analysis) . . . . .                                                    | 7         |
| Table S3 Sensitivity analysis for ecosystem size effects . . . . .                                         | 8         |
| Table S4 Sensitivity analysis for ecosystem complexity effects . . . . .                                   | 9         |
| Table S5 List of fish species in Hokkaido, Japan . . . . .                                                 | 10        |
| Table S6 List of fish species in Midwest, US . . . . .                                                     | 12        |
| Table S7 Average predictive comparisons . . . . .                                                          | 16        |
| <b>Figures</b>                                                                                             | <b>17</b> |
| Figure S1 Longitudinal gradient of local species richness ( $\sigma_h = 1, \sigma_l = 0.01$ ) . . . . .    | 17        |
| Figure S2 Longitudinal gradient of local species richness ( $\sigma_h = 1, \sigma_l = 1$ ) . . . . .       | 18        |
| Figure S3 Longitudinal gradient of local species richness ( $\sigma_h = 0.01, \sigma_l = 0.01$ ) . . . . . | 19        |
| Figure S4 Longitudinal gradient of local species richness ( $\sigma_h = 0.01, \sigma_l = 1$ ) . . . . .    | 20        |
| Figure S5 Influence of ecosystem size ( $p_d = 0.1, \sigma_h = 1, \sigma_l = 0.01$ ) . . . . .             | 21        |
| Figure S6 Influence of ecosystem size ( $p_d = 0.1, \sigma_h = 1, \sigma_l = 1$ ) . . . . .                | 22        |
| Figure S7 Influence of ecosystem size ( $p_d = 0.1, \sigma_h = 0.01, \sigma_l = 0.01$ ) . . . . .          | 23        |
| Figure S8 Influence of ecosystem size ( $p_d = 0.1, \sigma_h = 0.01, \sigma_l = 1$ ) . . . . .             | 24        |
| Figure S9 Influence of ecosystem size ( $p_d = 0.01, \sigma_h = 1, \sigma_l = 1$ ) . . . . .               | 25        |
| Figure S10 Influence of ecosystem size ( $p_d = 0.01, \sigma_h = 0.01, \sigma_l = 0.01$ ) . . . . .        | 26        |
| Figure S11 Influence of ecosystem size ( $p_d = 0.01, \sigma_h = 0.01, \sigma_l = 1$ ) . . . . .           | 27        |
| Figure S12 Influence of ecosystem complexity ( $p_d = 0.1, \sigma_h = 1, \sigma_l = 0.01$ ) . . . . .      | 28        |
| Figure S13 Influence of ecosystem complexity ( $p_d = 0.1, \sigma_h = 1, \sigma_l = 1$ ) . . . . .         | 29        |
| Figure S14 Influence of ecosystem complexity ( $p_d = 0.1, \sigma_h = 0.01, \sigma_l = 0.01$ ) . . . . .   | 30        |
| Figure S15 Influence of ecosystem complexity ( $p_d = 0.1, \sigma_h = 0.01, \sigma_l = 1$ ) . . . . .      | 31        |
| Figure S16 Influence of ecosystem complexity ( $p_d = 0.01, \sigma_h = 1, \sigma_l = 1$ ) . . . . .        | 32        |
| Figure S17 Influence of ecosystem complexity ( $p_d = 0.01, \sigma_h = 0.01, \sigma_l = 0.01$ ) . . . . .  | 33        |

Figure S18 Influence of ecosystem complexity ( $p_d = 0.01, \sigma_h = 0.01, \sigma_l = 1$ ) . . . . . 34  
Figure S19 Correlation structure of explanatory variables . . . . . 35  
Figure S20 Sensitivity analysis of asymptotic species richness . . . . . 36

**References** . . . . . **37**

# Theory

## Sensitivity analysis

We performed a sensitivity analysis of the metacommunity simulation to identify key simulation parameters that strongly affect the relationships between diversity metrics ( $\alpha$ ,  $\beta$ , and  $\gamma$ ) and ecosystem properties (the number of habitat patches  $N_p$  and branching probability  $P_b$ ). We generated 500 sets of parameter combinations by randomly drawing values of 8 simulation parameters from uniform distributions (**Table S1**). For each parameter combination, we generated 100 branching networks with the gradients of ecosystem size ( $N_p \sim Unif(10, 150)$ ) and complexity ( $P_b \sim Unif(0.01, 0.99)$ ). This results in a total of 50000 simulation replicates. In each simulation replicate, we allowed interspecific variation in niche optimum  $\mu_i$  and width  $\sigma_{niche,i}$  ( $\mu_i \sim Unif(-1, 1)$  and  $\sigma_{niche,i} \sim Unif(0.1, 1)$ , respectively; subscript  $i$  represents species) and ran 1400 time steps of metacommunity dynamics. We obtained temporal means of  $\alpha$ ,  $\beta$ , and  $\gamma$  diversity for the last 1000 time steps. The first 400 time steps were discarded as initialization and burn-in periods. We removed simulation replicates in which no species established populations over the initial 400 time steps.

For each parameter combination, we regressed log-transformed  $\alpha$ ,  $\beta$ , and  $\gamma$  diversity ( $\log_{10} y_j$  for network replicate  $j$ ) on the number of habitat patches  $N_p$  and branching probability  $P_b$  as:

$$\begin{aligned} \log_{10} y_j &\sim Normal(\mu_j, \sigma^2) \\ \mu_j &= \psi_0 + \psi_1 \log_{10} N_{p,j} + \psi_2 \log_{10} P_{b,j} \end{aligned} \quad (1)$$

where  $\psi_k$  ( $k = 0 - 2$ ) are the intercept ( $\psi_0$ ) and regression coefficients ( $\psi_1$  and  $\psi_2$ ). We extracted 500 estimates of  $\psi_1$  and  $\psi_2$ , which represent the effects of  $N_p$  and  $P_b$  on diversity metrics under a given parameter combination. To examine influences of simulation parameters (**Table S1**) on  $\psi_1$  and  $\psi_2$ , we developed the following regression model taking  $\psi_1$  or  $\psi_2$  as a response variable  $u_n$  (parameter combination  $n$ ):

$$\begin{aligned} u_n &\sim Normal(\mu_n, \sigma^2) \\ \mu_n &= \zeta_0 + \zeta_1 \sigma_{h,n} + \zeta_2 \sigma_{l,n} + \zeta_3 \sigma_{z,n} + \zeta_4 \phi_n + \zeta_5 \nu_n + \zeta_6 b_{max,n} + \zeta_7 \theta_n + \zeta_8 p_{d,n} \end{aligned} \quad (2)$$

where  $\zeta_k$  ( $k = 0 - 8$ ) are the intercept ( $\zeta_0$ ) and regression coefficients ( $\zeta_{1-8}$ ). Explanatory variables were standardized to a mean of zero and a standard deviation of one, so that regression coefficients are comparable.

The sensitivity analysis revealed key simulation parameters. For the effects of  $N_p$ , the following simulation parameters were influential: the degree of local environmental noise ( $\sigma_l$ ; influenced the effects on  $\alpha$  and  $\gamma$  diversity), the maximum value of interspecific competition coefficient ( $b_{max}$ ; influenced the effects on  $\alpha$ ,  $\beta$ , and  $\gamma$  diversity), dispersal distance ( $\theta$ ; influenced the effects on  $\alpha$  and  $\beta$  diversity), and dispersal probability ( $p_d$ ; influenced the effect on  $\alpha$  diversity) (**Table S3**). For the effects of  $P_b$ , the following simulation parameters were influential: environmental variation at headwaters ( $\sigma_h$ ; influenced the effect on  $\gamma$  diversity), the degree of local environmental noise ( $\sigma_l$ ; influenced the effects on  $\alpha$  and  $\beta$  diversity), and dispersal distance ( $\theta$ ; influenced the effects on  $\alpha$  and  $\beta$  diversity) (**Table S4**).

Based on the results, we identified  $\sigma_h$ ,  $\sigma_l$ ,  $b_{max}$ ,  $\theta$ , and  $p_d$  as key parameters. We changed the values of these parameters in the main analysis and examined the relationships between diversity metrics and ecosystem properties.

## Longitudinal gradient of local species richness

Longitudinal gradients of local species richness have been extensively studied in rivers, illuminating typical patterns observed in nature. The most common pattern is a downstream increase of local species richness (1–3). However, recent empirical and theoretical studies also showed ‘reversed patterns,’ in which local species richness decreases downstream (4, 5). We predicted the longitudinal gradient of local species richness to confirm that our simulation scenarios are capable of reproducing the previously observed patterns of local species

richness. We considered 32 simulation scenarios comprising four landscape and eight ecological scenarios, as described in the main text (a set of parameters is described in **Table S2**). Under each simulation scenario, we generated 10 branching networks with fixed parameters of ecosystem size ( $N_p = 100$ ) and complexity ( $P_b = 0.5$ ). This results in a total of 320 simulation replicates. In each simulation replicate, we allowed interspecific variation in niche optimum  $\mu_i$  and width  $\sigma_{niche,i}$  ( $\mu_i \sim Unif(-1, 1)$  and  $\sigma_{niche,i} \sim Unif(0.1, 1)$ , respectively; subscript  $i$  represents species) and ran 1400 time steps of metacommunity dynamics. We obtained temporal means of local species richness at each habitat patch for the last 1000 time steps. The first 400 time steps were discarded as initialization and burn-in periods. We removed simulation replicates in which no species established populations over the initial 400 time steps. We evaluated the relationship between local species richness and the number of upstream habitat patches, a proxy for the longitudinal position of a habitat patch.

The simulation reproduced diverse patterns of longitudinal gradients in local species richness (**Figures S1-4**). The downstream increase of local species richness was predicted under a natural landscape scenario, in which environmental variation at headwaters  $\sigma_h$  exceeds the degree of local environmental noise  $\sigma_l$  (**Figure S1**). This pattern was consistent across ecological scenarios except those with long dispersal distance and high dispersal probability (**Figure S1**). Similarly, we observed a downstream increase of local species richness in scenarios with low habitat diversity ( $\sigma_h = \sigma_l = 0.01$ ) and low dispersal probability ( $p_d = 0.01$ ) (**Figure S3**). However, there were cases where local species richness decreased downstream or showed no longitudinal patterns. For example, when local environmental noise exceeds environmental variation at headwaters ( $\sigma_l \geq \sigma_h$ ), local species richness showed a downstream decrease or a vague longitudinal pattern (**Figure S4**). Therefore, the simulation scenarios were capable of reproducing previously observed patterns, suggesting the appropriateness in the choice of parameter combinations.

## Empirical data

### Data selection criteria

**Hokkaido, Japan.** In Hokkaido, most data were collected from summer to fall. We screened data through the following procedure:

1. We listed recorded fish species and re-organized species names to make them consistent across data sources. We removed the following species at this stage: (1) identified at the family-level; (2) marine fish species (including species that occasionally use brackish/freshwater habitats).
2. We selected sampling sites based on the following criteria: (1) surveys were conducted with netting and/or electrofishing, (2) surveys were designed to collect a whole fish community, (3) sites contained reliable coordinates (sites with coordinates identical at 3 decimal degrees were treated as the same site), and (4) sites did not involve unidentified species (genus level) that are rarely observed in the data set ( $< 100$  sites occurrence).
3. For sites with multiple visits (i.e., temporal replicates), we used the latest-year observation at each sampling site to minimize variation in sampling efforts among sites. Surveys that occurred in the same year were aggregated into a single observation.
4. We confined sites to those with the latest observation year of  $\geq 1990$ . Although the data set contained observations from 1953, we added this restriction to align the observation period with the data set in the Midwest, US.
5. Four genera (*Lethenteron*, *Pungitius*, *Rhinogobius*, and *Tribolodon*) were treated as species groups (i.e., spp.) as their taxonomic resolutions varied greatly among data sources due to difficulties in identifying species.

**Midwest, US.** In the Midwest, the data set covered most of Upper Mississippi (Hydrologic Unit Code 2 [HUC 2], region 07, as defined by U.S. Geological Survey and U.S. Department of Agriculture Natural Resources Conservation Service (6)) and the part of Great Lakes (HUC 2, region 04), Missouri (HUC 2,

region 10), and Ohio (HUC 2, region 05). Fish data were collected from summer to fall with electrofishing (backpack, barge-type, or boat-mounted) and supplemental netting at some locations. We screened data through the following procedure:

1. We used data of the Upper Mississippi (HUC 2, region 07) and Great Lakes basins (HUC 2, region 04) as most sites are included in these regions.
2. We removed records of unidentified species, hybrid species, and commercial species apparently absent in the wild (e.g., goldfish).
3. We used the latest observation at each sampling site to minimize variation in sampling efforts among sites.

## Asymptotic species richness

We evaluated sensitivity of asymptotic species richness (Chao 2 estimator) to sample size (i.e., the number of sampling sites in a watershed). We simulated presence-absence data of species with known values of true species richness  $S_{true}$  and the number of sampling sites  $N_{site}$ . In this simulation, the presence of species  $i$  at site  $x$ ,  $J_{ix}$ , was drawn from a Bernoulli distribution as  $J_{ix} \sim Bernoulli(p_i \kappa_{ix})$  where  $p_i$  is the detection probability for species  $i$  and  $\kappa_{ix}$  is the presence probability of species  $i$  at site  $x$ . Based on the incidence frequency of simulated species  $F_i = \sum_{x=1}^{N_{site}} J_{ix}$ , we estimated asymptotic species richness using the iNEXT function in the R package ‘iNEXT’ (7). We calculated % bias of estimated asymptotic species richness  $S_{est}$ :

$$\% \text{ bias} = \frac{100(S_{est} - S_{true})}{S_{true}} \quad (3)$$

Positive values of % bias indicate an overestimation of species richness, while negative values indicate an underestimation.

We used the following values for parameters:  $S_{true} = 10, 40, 70, 100$  and  $N_{site} = 5, 10, 15, 20, 100$ . We produced 100 replicates of simulated data sets for each parameter combination, resulting in a total of 2000 simulation replicates. In each simulation replicate, the probabilities of detection and true presence were drawn randomly from uniform distributions as  $p_i \sim Unif(0.3, 0.8)$  and  $\kappa_{ix} \sim Unif(0, 1)$ .

The number of sampling sites influenced the estimation accuracy of asymptotic species richness. The % bias decreased sharply as the number of sampling sites increased (**Figure S20**). In particular, the estimation bias with a small sample size ( $N_{site} = 5$ ) was substantial when the true species richness  $S_{true}$  was low; some estimates showed  $> 150\%$  bias (**Figure S20**). Given the simulation results, estimates of asymptotic species richness at watersheds with  $< 10$  sampling sites may involve substantial statistical uncertainty.

## Average predictive comparison

For regression models, standardized regression coefficients (or its variant) are perhaps the most common summary when comparing effect sizes of explanatory variables. These values are useful if they are directly interpretable. For example, in linear regression models without interactions and variable transformations, regression coefficients have direct interpretations as they represent additive effects. However, there are many cases where regression coefficients are difficult to interpret. In our case, we regressed the log-transformed species richness on explanatory variables, so regression coefficients do not have direct interpretations on the original scale of the response variable  $y$  (i.e., species richness).

The average predictive comparison provides an intuitive yet rigorous way to quantify effect sizes for each of explanatory variables in regression models with interactions and/or variable transformations (8). The basic predictive comparison  $\delta_u$  is an expected change in  $y$  on the original scale per a unit difference of the explanatory variable of interest:

$$\delta_u(u^{(1)} \rightarrow u^{(2)}, v, \Theta) = \frac{E(y|u^{(2)}, v, \Theta) - E(y|u^{(1)}, v, \Theta)}{u^{(2)} - u^{(1)}} \quad (4)$$

where  $E(\cdot)$  is a known function (e.g., exponential),  $u$  the input of interest (a value for the explanatory variable of interest),  $v$  all the other inputs (a vector in general),  $\Theta$  a set of parameters in a regression model. In general,  $\delta_u$  rests on  $u^{(1)}$  and  $u^{(2)}$  (the lower and higher points of the hypothesized change in the explanatory variable of interest),  $v$ , and  $\Theta$ . Therefore, Gelman and Pardoe (8) defined the *average predictive comparison*  $\Delta_u$  as “the mean value of  $\delta_u$  over some specified distribution of the inputs and parameters”:

$$\Delta_u = \frac{\int \int_{u^{(2)} > u^{(1)}} du^{(1)} du^{(2)} \int dv \int d\Theta (E(y|u^{(2)}, v, \Theta) - E(y|u^{(1)}, v, \Theta)) p(u^{(1)}|v) p(u^{(2)}|v) p(v) p(\Theta)}{\int \int_{u^{(2)} > u^{(1)}} du^{(1)} du^{(2)} \int dv \int d\Theta (u^{(2)} - u^{(1)}) p(u^{(1)}|v) p(u^{(2)}|v) p(v) p(\Theta)} \quad (5)$$

However, directly using the above equation is impractical because estimating  $p(u^{(1)}|v)$  and  $p(u^{(2)}|v)$  from finite data points is challenging (especially when  $v$  is continuous). Instead, we estimated  $\Delta_u$  using the following equation proposed by Gelman and Pardoe (8):

$$\hat{\Delta}_u = \frac{\sum_{i=1}^n \sum_{j=1}^n \sum_{s=1}^S w_{ij} (E(y|u_j, v_i, \Theta_s) - E(y|u_i, v_i, \Theta_s)) \text{sign}(u_j - u_i)}{\sum_{i=1}^n \sum_{j=1}^n \sum_{s=1}^S w_{ij} (u_j - u_i) \text{sign}(u_j - u_i)} \quad (6)$$

The summations over  $n$  data ( $i$  and  $j$  are a given data point) and  $S$  parameter replicates ( $s$  is a given simulation replicate) are a realization of averaging over the distributions of  $(u^{(1)}, v)$ ,  $u^{(2)}$ , and  $\Theta$ . The factor  $w_{ij}$  is a weight that serves to approximate  $p(u^{(1)}|v)$  and  $p(u^{(2)}|v)$ . In theory,  $v$  must be held constant while the input of interest changes from  $u^{(1)}$  to  $u^{(2)}$ . However, there are, if any, few transitions from  $u^{(1)}$  to  $u^{(2)}$  with a common  $v$ . We approximate such exact transitions by assigning each pair of data points with a weight:

$$w_{ij} = w(v_i, v_j) \quad (7)$$

The weight factor should represent the likelihood of  $u$  changing from  $u_i$  to  $u_j$  with a common  $v = v_i$  ( $v_i$  is in general a vector of explanatory variables for data point  $i$ ). We used the following weighting function based on Mahalanobis distances following Gelman and Pardoe (8):

$$w(v_i, v_j) = \frac{1}{1 + (v_i - v_j)^T \Omega_v^{-1} (v_i - v_j)} \quad (8)$$

where  $\Omega_v^{-1}$  is the inverse of the variance-covariance matrix of  $v$ . Note that  $v = v_i$  when  $u = u_i$ , and  $v = v_j$  when  $u = u_j$ . The function gives the maximum weight for a pair of  $u_i$  and  $u_j$  if  $v_i = v_j$  while giving a less weight as the Mahalanobis distance between  $v_i$  and  $v_j$  increases. This property makes sense because our goal is to approximate the probability of transition from  $u_i$  to  $u_j$  with a common  $v$  (i.e.,  $v_i = v_j$ ).

We estimated  $\hat{\Delta}_u$  for watershed area and branching probability using the estimated coefficients  $\hat{\xi}_k$  of the regression model explaining  $\gamma$  diversity (see **Table 1**). A thousand of vectors of simulated parameters  $\Theta_s$  were drawn from normal distributions with means of  $\hat{\xi}_k$  and standard deviations of  $\sigma_{\xi,k}$  (the estimated standard errors of parameters  $\xi_k$ ). The estimated average predictive comparisons are  $\hat{\Delta}_u = \frac{1}{S} \sum_{s=1}^S \hat{\Delta}_{u,s}$  where

$$\hat{\Delta}_{u,s} = \frac{\sum_{i=1}^n \sum_{j=1}^n w_{ij} (E(y|u_j, v_i, \Theta_s) - E(y|u_i, v_i, \Theta_s)) \text{sign}(u_j - u_i)}{\sum_{i=1}^n \sum_{j=1}^n w_{ij} (10^{u_j} - 10^{u_i}) \text{sign}(u_j - u_i)} \quad (9)$$

We exponentiated  $u_i$  and  $u_j$  in the denominator because we log-transformed watershed area and branching probability in the statistical model. Then

$$S.E.(\hat{\Delta}_{u,s}) = \sqrt{\frac{1}{S-1} \sum_{s=1}^S (\hat{\Delta}_{u,s} - \hat{\Delta}_u)^2} \quad (10)$$

The estimated average predictive comparisons were summarized in **Table S7**.



## Tables

**Table S1 Simulation parameter (sensitivity analysis)**

**Table S1** Parameter values used in the sensitivity analysis of the metacommunity simulation. See the main text for model details.

| Parameter  | Value           | Interpretation                                                        |
|------------|-----------------|-----------------------------------------------------------------------|
| $\sigma_h$ | Unif(0.01, 1)   | Environmental variation at headwaters                                 |
| $\sigma_l$ | Unif(0.01, 1)   | Degree of local environmental noise                                   |
| $\sigma_z$ | Unif(0.01, 0.5) | Temporal environmental variability                                    |
| $\rho$     | 1               | Strength of spatial autocorrelation in mean environmental condition   |
| $\phi$     | Unif(0.01, 1)   | Extent of spatial autocorrelation in temporal environmental variation |
| $\nu$      | Unif(1, 5)      | Cost of a wider niche                                                 |
| $b_{max}$  | Unif(0.5, 1.5)  | Maximum value of interspecific competition coefficient                |
| $\theta$   | Unif(0.1, 1)    | Rate parameter of an exponential dispersal kernel                     |
| $p_d$      | Unif(0.01, 0.1) | Dispersal probability                                                 |
| $r_{0,i}$  | 4               | Maximum reproductive rate                                             |

## Table S2 Simulation parameter (main analysis)

**Table S2** Values and interpretation of simulation parameters used in the main simulation. See the main text for model details.

| Parameter  | Value      | Interpretation                                                        |
|------------|------------|-----------------------------------------------------------------------|
| $\sigma_h$ | 0.01, 1.00 | Environmental variation at headwaters                                 |
| $\sigma_l$ | 0.01, 1.00 | Degree of local environmental noise                                   |
| $\sigma_z$ | 0.1        | Temporal environmental variability                                    |
| $\rho$     | 1          | Strength of spatial autocorrelation in mean environmental condition   |
| $\phi$     | 0.05       | Extent of spatial autocorrelation in temporal environmental variation |
| $\nu$      | 1          | Cost of a wider niche                                                 |
| $b_{max}$  | 0.75, 1.50 | Maximum value of interspecific competition coefficient                |
| $\theta$   | 0.1, 1.0   | Rate parameter of an exponential dispersal kernel                     |
| $p_d$      | 0.01, 0.10 | Dispersal probability                                                 |
| $r_{0,i}$  | 4          | Maximum reproductive rate                                             |

### Table S3 Sensitivity analysis for ecosystem size effects

**Table S3** Sensitivity analysis of the metacommunity simulation. Parameter estimates of linear regression models (standard errors in parenthesis) are shown. Response variables are the effects of the number of habitat patches ( $N_p$ ) on  $\alpha$ ,  $\beta$ , and  $\gamma$  diversity. Explanatory variables (i.e., simulation parameters) were standardized to a mean of zero and a standard deviation of one prior to the analysis. See **Tables S1 and S2** for interpretation of the simulation parameters.

|            | Response variable                     |                                      |                                       |
|------------|---------------------------------------|--------------------------------------|---------------------------------------|
|            | Effect of $N_p$ on $\alpha$ diversity | Effect of $N_p$ on $\beta$ diversity | Effect of $N_p$ on $\gamma$ diversity |
| $\sigma_h$ | 0.008<br>(0.002)                      | -0.003<br>(0.001)                    | 0.005<br>(0.002)                      |
| $\sigma_l$ | -0.021<br>(0.002)                     | 0.004<br>(0.001)                     | -0.018<br>(0.002)                     |
| $\sigma_z$ | 0.0001<br>(0.002)                     | -0.013<br>(0.001)                    | -0.013<br>(0.002)                     |
| $\phi$     | 0.001<br>(0.002)                      | -0.0002<br>(0.001)                   | 0.0003<br>(0.002)                     |
| $\nu$      | -0.001<br>(0.002)                     | -0.009<br>(0.001)                    | -0.009<br>(0.002)                     |
| $b_{max}$  | 0.019<br>(0.002)                      | 0.028<br>(0.001)                     | 0.047<br>(0.002)                      |
| $\theta$   | -0.040<br>(0.002)                     | 0.041<br>(0.001)                     | 0.001<br>(0.002)                      |
| $p_d$      | 0.017<br>(0.002)                      | -0.006<br>(0.001)                    | 0.010<br>(0.002)                      |
| Intercept  | 0.147<br>(0.002)                      | 0.137<br>(0.001)                     | 0.284<br>(0.002)                      |

## Table S4 Sensitivity analysis for ecosystem complexity effects

**Table S4** Sensitivity analysis of the metacommunity simulation. Parameter estimates of linear regression models (standard errors in parenthesis) are shown. Response variables are the effects of branching probability ( $P_b$ ) on  $\alpha$ ,  $\beta$ , and  $\gamma$  diversity. Explanatory variables (i.e., simulation parameters) were standardized to a mean of zero and a standard deviation of one prior to the analysis. See **Tables S1 and S2** for interpretation of the simulation parameters.

|            | Response variable                     |                                      |                                       |
|------------|---------------------------------------|--------------------------------------|---------------------------------------|
|            | Effect of $P_b$ on $\alpha$ diversity | Effect of $P_b$ on $\beta$ diversity | Effect of $P_b$ on $\gamma$ diversity |
| $\sigma_h$ | 0.012<br>(0.003)                      | 0.007<br>(0.002)                     | 0.019<br>(0.002)                      |
| $\sigma_l$ | 0.060<br>(0.003)                      | -0.047<br>(0.002)                    | 0.013<br>(0.002)                      |
| $\sigma_z$ | -0.004<br>(0.003)                     | -0.002<br>(0.002)                    | -0.006<br>(0.002)                     |
| $\phi$     | 0.002<br>(0.003)                      | 0.001<br>(0.002)                     | 0.002<br>(0.002)                      |
| $\nu$      | -0.001<br>(0.003)                     | 0.001<br>(0.002)                     | -0.001<br>(0.002)                     |
| $b_{max}$  | -0.006<br>(0.003)                     | -0.001<br>(0.002)                    | -0.006<br>(0.002)                     |
| $\theta$   | 0.027<br>(0.003)                      | -0.028<br>(0.002)                    | -0.001<br>(0.002)                     |
| $p_d$      | 0.007<br>(0.003)                      | -0.007<br>(0.002)                    | -0.0002<br>(0.002)                    |
| Intercept  | 0.145<br>(0.003)                      | -0.132<br>(0.002)                    | 0.013<br>(0.002)                      |

## Table S5 List of fish species in Hokkaido, Japan

**Table S5** List of fish species in Hokkaido, Japan, included in our statistical analysis. 52 species are ordered alphabetically, along with the number of sites present and % occupancy of 2650 sites.

| Species                                   | Number of sites present | Occupancy (%) |
|-------------------------------------------|-------------------------|---------------|
| <i>Acanthogobius lactipes</i>             | 66                      | 2.49          |
| <i>Anguilla japonica</i>                  | 1                       | 0.04          |
| <i>Carassius buergeri</i> subsp. 2        | 4                       | 0.15          |
| <i>Carassius cuvieri</i>                  | 24                      | 0.91          |
| <i>Carassius</i> sp.                      | 215                     | 8.11          |
| <i>Channa argus</i>                       | 3                       | 0.11          |
| <i>Cottus amblystomopsis</i>              | 49                      | 1.85          |
| <i>Cottus hangiongensis</i>               | 99                      | 3.74          |
| <i>Cottus nozawae</i>                     | 848                     | 32.00         |
| <i>Cottus</i> sp. ME                      | 25                      | 0.94          |
| <i>Cyprinus carpio</i>                    | 50                      | 1.89          |
| <i>Gasterosteus aculeatus</i>             | 163                     | 6.15          |
| <i>Gnathopogon caeruleus</i>              | 1                       | 0.04          |
| <i>Gnathopogon elongatus elongatus</i>    | 2                       | 0.08          |
| <i>Gymnogobius breunigii</i>              | 34                      | 1.28          |
| <i>Gymnogobius castaneus</i> complex      | 149                     | 5.62          |
| <i>Gymnogobius opperiens</i>              | 93                      | 3.51          |
| <i>Gymnogobius petschiliensis</i>         | 2                       | 0.08          |
| <i>Gymnogobius urotaenia</i>              | 313                     | 11.81         |
| <i>Hucho perryi</i>                       | 61                      | 2.30          |
| <i>Hypomesus nipponensis</i>              | 173                     | 6.53          |
| <i>Hypomesus olidus</i>                   | 8                       | 0.30          |
| <i>Lefua nikkonis</i>                     | 21                      | 0.79          |
| <i>Lethenteron</i> spp.                   | 752                     | 28.38         |
| <i>Leucopsarion petersii</i>              | 2                       | 0.08          |
| <i>Luciogobius guttatus</i>               | 3                       | 0.11          |
| <i>Misgurnus anguillicaudatus</i>         | 221                     | 8.34          |
| <i>Noemacheilus barbatulus</i>            | 1623                    | 61.25         |
| <i>Oncorhynchus gorboscha</i>             | 29                      | 1.09          |
| <i>Oncorhynchus keta</i>                  | 153                     | 5.77          |
| <i>Oncorhynchus masou masou</i>           | 1444                    | 54.49         |
| <i>Oncorhynchus mykiss</i>                | 466                     | 17.58         |
| <i>Oncorhynchus nerka</i>                 | 6                       | 0.23          |
| <i>Opsariichthys platypus</i>             | 1                       | 0.04          |
| <i>Osmerus dentex</i>                     | 6                       | 0.23          |
| <i>Phoxinus phoxinus sachalinensis</i>    | 69                      | 2.60          |
| <i>Plecoglossus altivelis altivelis</i>   | 112                     | 4.23          |
| <i>Pseudorasbora parva</i>                | 93                      | 3.51          |
| <i>Pungitius</i> spp.                     | 294                     | 11.09         |
| <i>Rhinogobius</i> spp.                   | 181                     | 6.83          |
| <i>Rhodeus ocellatus ocellatus</i>        | 22                      | 0.83          |
| <i>Salangichthys microdon</i>             | 10                      | 0.38          |
| <i>Salmo trutta</i>                       | 15                      | 0.57          |
| <i>Salvelinus fontinalis</i>              | 2                       | 0.08          |
| <i>Salvelinus leucomaenis leucomaenis</i> | 640                     | 24.15         |
| <i>Salvelinus malma</i>                   | 274                     | 10.34         |
| <i>Salvelinus malma miyabei</i>           | 2                       | 0.08          |

| Species                        | Number of sites present | Occupancy (%) |
|--------------------------------|-------------------------|---------------|
| <i>Silurus asotus</i>          | 7                       | 0.26          |
| <i>Spirinchus lanceolatus</i>  | 6                       | 0.23          |
| <i>Tribolodon</i> spp.         | 1197                    | 45.17         |
| <i>Tridentiger brevispinis</i> | 136                     | 5.13          |
| <i>Tridentiger obscurus</i>    | 7                       | 0.26          |

## Table S6 List of fish species in Midwest, US

**Table S6** List of fish species in the Midwest, US, included in our statistical analysis. 159 species are ordered alphabetically, along with the number of sites present and % occupancy of 3999 sites.

| Species                             | Number of sites present | Occupancy (%) |
|-------------------------------------|-------------------------|---------------|
| <i>Acipenser fulvescens</i>         | 7                       | 0.18          |
| <i>Alosa pseudoharengus</i>         | 1                       | 0.03          |
| <i>Ambloplites rupestris</i>        | 706                     | 17.65         |
| <i>Ameiurus melas</i>               | 868                     | 21.71         |
| <i>Ameiurus natalis</i>             | 663                     | 16.58         |
| <i>Ameiurus nebulosus</i>           | 30                      | 0.75          |
| <i>Amia calva</i>                   | 95                      | 2.38          |
| <i>Ammocrypta clara</i>             | 12                      | 0.30          |
| <i>Aphredoderus sayanus</i>         | 76                      | 1.90          |
| <i>Aplodinotus grunniens</i>        | 208                     | 5.20          |
| <i>Campostoma anomalum</i>          | 1345                    | 33.63         |
| <i>Campostoma oligolepis</i>        | 124                     | 3.10          |
| <i>Carpiodes carpio</i>             | 128                     | 3.20          |
| <i>Carpiodes cyprinus</i>           | 234                     | 5.85          |
| <i>Carpiodes velifer</i>            | 82                      | 2.05          |
| <i>Catostomus commersonii</i>       | 2928                    | 73.22         |
| <i>Centrarchus macropterus</i>      | 5                       | 0.13          |
| <i>Chrosomus eos</i>                | 336                     | 8.40          |
| <i>Chrosomus neogaeus</i>           | 102                     | 2.55          |
| <i>Clinostomus elongatus</i>        | 96                      | 2.40          |
| <i>Cottus bairdii</i>               | 466                     | 11.65         |
| <i>Cottus carolinae</i>             | 6                       | 0.15          |
| <i>Cottus cognatus</i>              | 38                      | 0.95          |
| <i>Crystallaria asprella</i>        | 1                       | 0.03          |
| <i>Ctenopharyngodon idella</i>      | 19                      | 0.48          |
| <i>Culaea inconstans</i>            | 1532                    | 38.31         |
| <i>Cyprinella lutrensis</i>         | 269                     | 6.73          |
| <i>Cyprinella spiloptera</i>        | 778                     | 19.45         |
| <i>Cyprinella venusta</i>           | 2                       | 0.05          |
| <i>Cyprinella whipplei</i>          | 33                      | 0.83          |
| <i>Cyprinus carpio</i>              | 945                     | 23.63         |
| <i>Dorosoma cepedianum</i>          | 208                     | 5.20          |
| <i>Erimystax x-punctatus</i>        | 13                      | 0.33          |
| <i>Erimyzon oblongus</i>            | 63                      | 1.58          |
| <i>Erimyzon sucetta</i>             | 10                      | 0.25          |
| <i>Esox americanus vermiculatus</i> | 117                     | 2.93          |
| <i>Esox lucius</i>                  | 957                     | 23.93         |
| <i>Esox masquinongy</i>             | 20                      | 0.50          |
| <i>Etheostoma asprigene</i>         | 10                      | 0.25          |
| <i>Etheostoma blennioides</i>       | 1                       | 0.03          |
| <i>Etheostoma caeruleum</i>         | 194                     | 4.85          |
| <i>Etheostoma chlorosomum</i>       | 4                       | 0.10          |
| <i>Etheostoma crossopterygum</i>    | 4                       | 0.10          |
| <i>Etheostoma exile</i>             | 261                     | 6.53          |
| <i>Etheostoma flabellare</i>        | 843                     | 21.08         |
| <i>Etheostoma gracile</i>           | 15                      | 0.38          |
| <i>Etheostoma kennicotti</i>        | 1                       | 0.03          |

| Species                            | Number of sites present | Occupancy (%) |
|------------------------------------|-------------------------|---------------|
| <i>Etheostoma microperca</i>       | 20                      | 0.50          |
| <i>Etheostoma nigrum</i>           | 2544                    | 63.62         |
| <i>Etheostoma proeliare</i>        | 2                       | 0.05          |
| <i>Etheostoma spectabile</i>       | 119                     | 2.98          |
| <i>Etheostoma squamiceps</i>       | 4                       | 0.10          |
| <i>Etheostoma zonale</i>           | 320                     | 8.00          |
| <i>Fundulus diaphanus</i>          | 3                       | 0.08          |
| <i>Fundulus dispar</i>             | 4                       | 0.10          |
| <i>Fundulus notatus</i>            | 281                     | 7.03          |
| <i>Fundulus olivaceus</i>          | 42                      | 1.05          |
| <i>Hiodon alosoides</i>            | 3                       | 0.08          |
| <i>Hiodon tergisus</i>             | 16                      | 0.40          |
| <i>Hybognathus hankinsoni</i>      | 575                     | 14.38         |
| <i>Hybognathus nuchalis</i>        | 24                      | 0.60          |
| <i>Hybopsis amnis</i>              | 1                       | 0.03          |
| <i>Hypentelium nigricans</i>       | 680                     | 17.00         |
| <i>Hypophthalmichthys molitrix</i> | 14                      | 0.35          |
| <i>Hypophthalmichthys nobilis</i>  | 3                       | 0.08          |
| <i>Ichthyomyzon castaneus</i>      | 51                      | 1.28          |
| <i>Ichthyomyzon fossor</i>         | 35                      | 0.88          |
| <i>Ichthyomyzon gagei</i>          | 6                       | 0.15          |
| <i>Ichthyomyzon unicuspis</i>      | 9                       | 0.23          |
| <i>Ictalurus punctatus</i>         | 413                     | 10.33         |
| <i>Ictiobus bubalus</i>            | 90                      | 2.25          |
| <i>Ictiobus cyprinellus</i>        | 129                     | 3.23          |
| <i>Ictiobus niger</i>              | 41                      | 1.03          |
| <i>Labidesthes sicculus</i>        | 64                      | 1.60          |
| <i>Lepisosteus oculatus</i>        | 13                      | 0.33          |
| <i>Lepisosteus osseus</i>          | 25                      | 0.63          |
| <i>Lepisosteus platostomus</i>     | 58                      | 1.45          |
| <i>Lepomis cyanellus</i>           | 1573                    | 39.33         |
| <i>Lepomis gibbosus</i>            | 290                     | 7.25          |
| <i>Lepomis gulosus</i>             | 43                      | 1.08          |
| <i>Lepomis humilis</i>             | 356                     | 8.90          |
| <i>Lepomis macrochirus</i>         | 1050                    | 26.26         |
| <i>Lepomis megalotis</i>           | 186                     | 4.65          |
| <i>Lepomis microlophus</i>         | 19                      | 0.48          |
| <i>Lethenteron appendix</i>        | 123                     | 3.08          |
| <i>Lota lota</i>                   | 266                     | 6.65          |
| <i>Luxilus chrysocephalus</i>      | 196                     | 4.90          |
| <i>Luxilus cornutus</i>            | 1781                    | 44.54         |
| <i>Lythrurus fumeus</i>            | 6                       | 0.15          |
| <i>Lythrurus umbratilis</i>        | 222                     | 5.55          |
| <i>Macrhybopsis aestivalis</i>     | 1                       | 0.03          |
| <i>Macrhybopsis hyostoma</i>       | 3                       | 0.08          |
| <i>Macrhybopsis storeriana</i>     | 10                      | 0.25          |
| <i>Micropterus dolomieu</i>        | 746                     | 18.65         |
| <i>Micropterus punctulatus</i>     | 15                      | 0.38          |
| <i>Micropterus salmoides</i>       | 987                     | 24.68         |
| <i>Minytrema melanops</i>          | 41                      | 1.03          |
| <i>Morone americana</i>            | 2                       | 0.05          |
| <i>Morone chrysops</i>             | 65                      | 1.63          |



| Species                              | Number of sites present | Occupancy (%) |
|--------------------------------------|-------------------------|---------------|
| <i>Morone mississippiensis</i>       | 16                      | 0.40          |
| <i>Moxostoma anisurum</i>            | 288                     | 7.20          |
| <i>Moxostoma carinatum</i>           | 8                       | 0.20          |
| <i>Moxostoma duquesni</i>            | 103                     | 2.58          |
| <i>Moxostoma erythrurum</i>          | 708                     | 17.70         |
| <i>Moxostoma macrolepidotum</i>      | 737                     | 18.43         |
| <i>Moxostoma valenciennesi</i>       | 85                      | 2.13          |
| <i>Neogobius melanostomus</i>        | 13                      | 0.33          |
| <i>Nocomis biguttatus</i>            | 1285                    | 32.13         |
| <i>Notemigonus crysoleucas</i>       | 377                     | 9.43          |
| <i>Notropis anogenus</i>             | 10                      | 0.25          |
| <i>Notropis atherinoides</i>         | 207                     | 5.18          |
| <i>Notropis blennius</i>             | 16                      | 0.40          |
| <i>Notropis boops</i>                | 9                       | 0.23          |
| <i>Notropis buccatus</i>             | 47                      | 1.18          |
| <i>Notropis chalybaeus</i>           | 11                      | 0.28          |
| <i>Notropis dorsalis</i>             | 1087                    | 27.18         |
| <i>Notropis heterodon</i>            | 28                      | 0.70          |
| <i>Notropis heterolepis</i>          | 187                     | 4.68          |
| <i>Notropis hudsonius</i>            | 81                      | 2.03          |
| <i>Notropis nubilus</i>              | 58                      | 1.45          |
| <i>Notropis percobromus</i>          | 167                     | 4.18          |
| <i>Notropis rubellus</i>             | 62                      | 1.55          |
| <i>Notropis stramineus</i>           | 973                     | 24.33         |
| <i>Notropis texanus</i>              | 20                      | 0.50          |
| <i>Notropis volucellus</i>           | 81                      | 2.03          |
| <i>Notropis wickliffi</i>            | 10                      | 0.25          |
| <i>Noturus exilis</i>                | 33                      | 0.83          |
| <i>Noturus flavus</i>                | 478                     | 11.95         |
| <i>Noturus gyrinus</i>               | 447                     | 11.18         |
| <i>Noturus nocturnus</i>             | 38                      | 0.95          |
| <i>Oncorhynchus mykiss</i>           | 55                      | 1.38          |
| <i>Oncorhynchus tshawytscha</i>      | 1                       | 0.03          |
| <i>Opsopoeodus emiliae</i>           | 3                       | 0.08          |
| <i>Perca flavescens</i>              | 622                     | 15.55         |
| <i>Percina caprodes</i>              | 337                     | 8.43          |
| <i>Percina caprodes semifasciata</i> | 7                       | 0.18          |
| <i>Percina evides</i>                | 16                      | 0.40          |
| <i>Percina maculata</i>              | 888                     | 22.21         |
| <i>Percina phoxocephala</i>          | 259                     | 6.48          |
| <i>Percina sciera</i>                | 2                       | 0.05          |
| <i>Percopsis omiscomaycus</i>        | 21                      | 0.53          |
| <i>Phenacobius mirabilis</i>         | 258                     | 6.45          |
| <i>Phoxinus erythrogaster</i>        | 417                     | 10.43         |
| <i>Pimephales notatus</i>            | 1782                    | 44.56         |
| <i>Pimephales promelas</i>           | 1534                    | 38.36         |
| <i>Pimephales vigilax</i>            | 84                      | 2.10          |
| <i>Pomoxis annularis</i>             | 61                      | 1.53          |
| <i>Pomoxis nigromaculatus</i>        | 376                     | 9.40          |
| <i>Pylodictis olivaris</i>           | 73                      | 1.83          |
| <i>Rhinichthys atratulus</i>         | 1118                    | 27.96         |
| <i>Rhinichthys cataractae</i>        | 627                     | 15.68         |

| Species                      | Number of sites present | Occupancy (%) |
|------------------------------|-------------------------|---------------|
| Rhinichthys obtusus          | 448                     | 11.20         |
| Salmo trutta                 | 400                     | 10.00         |
| Salvelinus fontinalis        | 372                     | 9.30          |
| Sander canadensis            | 39                      | 0.98          |
| Sander vitreus               | 367                     | 9.18          |
| Scaphirhynchus platyrhynchus | 8                       | 0.20          |
| Semotilus atromaculatus      | 2774                    | 69.37         |
| Umbra limi                   | 1600                    | 40.01         |

### Table S7 Average predictive comparisons

Estimated average predictive comparisons. Regression coefficients were derived from the regression model explaining  $\gamma$  diversity (see **Table 1** in the maintext for the estimated regression parameters). The average predictive comparisons (an expected increase in  $\gamma$  diversity per a unit difference of the explanatory variable of interest) were estimated based on units of 1000 km<sup>2</sup> for watershed area and 0.1 for branching probability.

| Input                 | Estimate | SE   | Unit                 |
|-----------------------|----------|------|----------------------|
| Watershed area        | 5.59     | 2.35 | 1000 km <sup>2</sup> |
| Branching probability | 8.37     | 2.74 | 0.1                  |

## Figures

Figure S1 Longitudinal gradient of local species richness ( $\sigma_h = 1$ ,  $\sigma_l = 0.01$ )

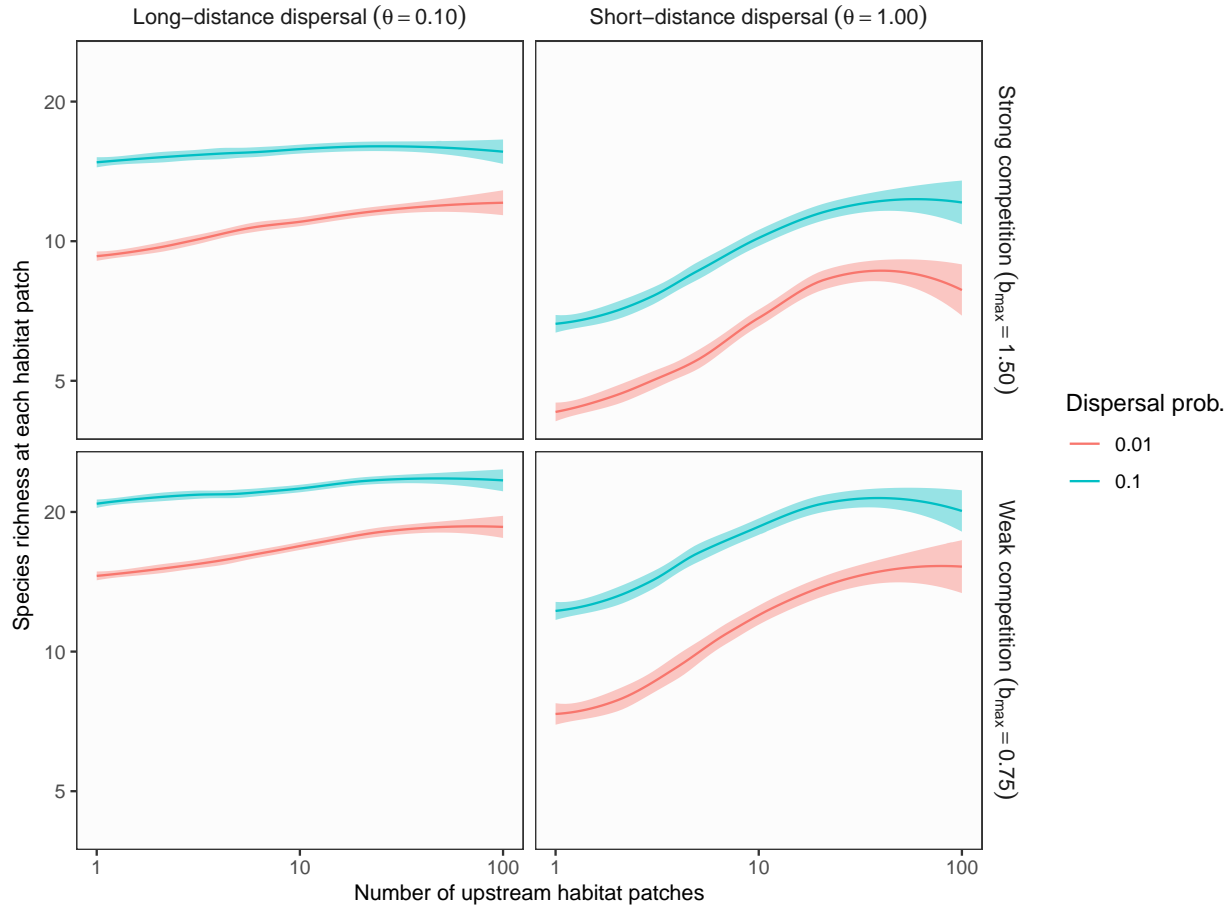

**Figure S1** Theoretical predictions for longitudinal gradients of local species richness in branching networks. The longitudinal position of each habitat patch (x-axis) was expressed as the number of upstream habitat patches. In this simulation, environmental variation at headwaters ( $\sigma_h$ ) exceeds local environmental noise ( $\sigma_l$ ). Lines and shades are loess curves fitted to simulated data and their 95% confidence intervals. Each panel represents different ecological scenarios under which metacommunity dynamics were simulated. Rows represent different competition strength. Competition coefficients ( $b_{ij}$ ) were varied randomly from 0 to 1.5 (top, strong competition) or 0.75 (bottom, weak competition). Columns and lines represent different dispersal scenarios (dispersal distance and probability). Left and right columns show long-distance (the rate parameter of an exponential dispersal kernel  $\theta = 0.10$ ) and short-distance dispersal ( $\theta = 1.0$ ) scenarios respectively. Red and blue lines show low ( $p_d = 0.01$ ) and high dispersal probabilities ( $p_d = 0.10$ ). Other parameters are as follows: environmental variation at headwaters  $\sigma_h = 1$ ; local environmental noise  $\sigma_l = 0.01$ ; ecosystem size  $N_p = 100$ ; ecosystem complexity  $P_b = 0.5$ .

**Figure S2** Longitudinal gradient of local species richness ( $\sigma_h = 1$ ,  $\sigma_l = 1$ )

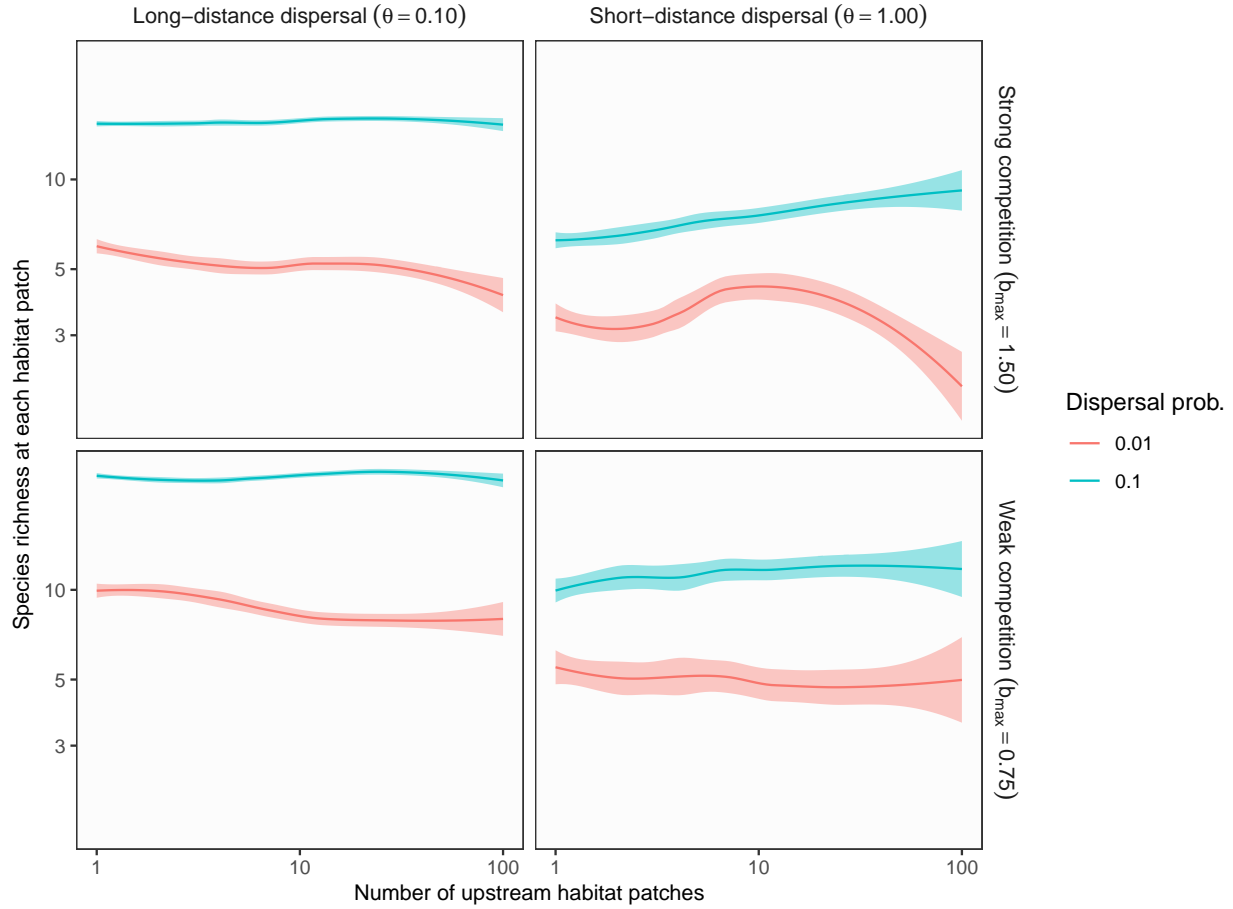

**Figure S2** Theoretical predictions for longitudinal gradients of local species richness in branching networks. The longitudinal position of each habitat patch (x-axis) was expressed as the number of upstream habitat patches. In this simulation, environmental variation at headwaters ( $\sigma_h$ ) is equal to local environmental noise ( $\sigma_l$ ). Lines and shades are loess curves fitted to simulated data and their 95% confidence intervals. Each panel represents different ecological scenarios under which metacommunity dynamics were simulated. Rows represent different competition strength. Competition coefficients ( $b_{ij}$ ) were varied randomly from 0 to 1.5 (top, strong competition) or 0.75 (bottom, weak competition). Columns and lines represent different dispersal scenarios (dispersal distance and probability). Left and right columns show long-distance (the rate parameter of an exponential dispersal kernel  $\theta = 0.10$ ) and short-distance dispersal ( $\theta = 1.0$ ) scenarios respectively. Red and blue lines show low ( $p_d = 0.01$ ) and high dispersal probabilities ( $p_d = 0.10$ ). Other parameters are as follows: environmental variation at headwaters  $\sigma_h = 1$ ; local environmental noise  $\sigma_l = 1$ ; ecosystem size  $N_p = 100$ ; ecosystem complexity  $P_b = 0.5$ .

**Figure S3** Longitudinal gradient of local species richness ( $\sigma_h = 0.01$ ,  $\sigma_l = 0.01$ )

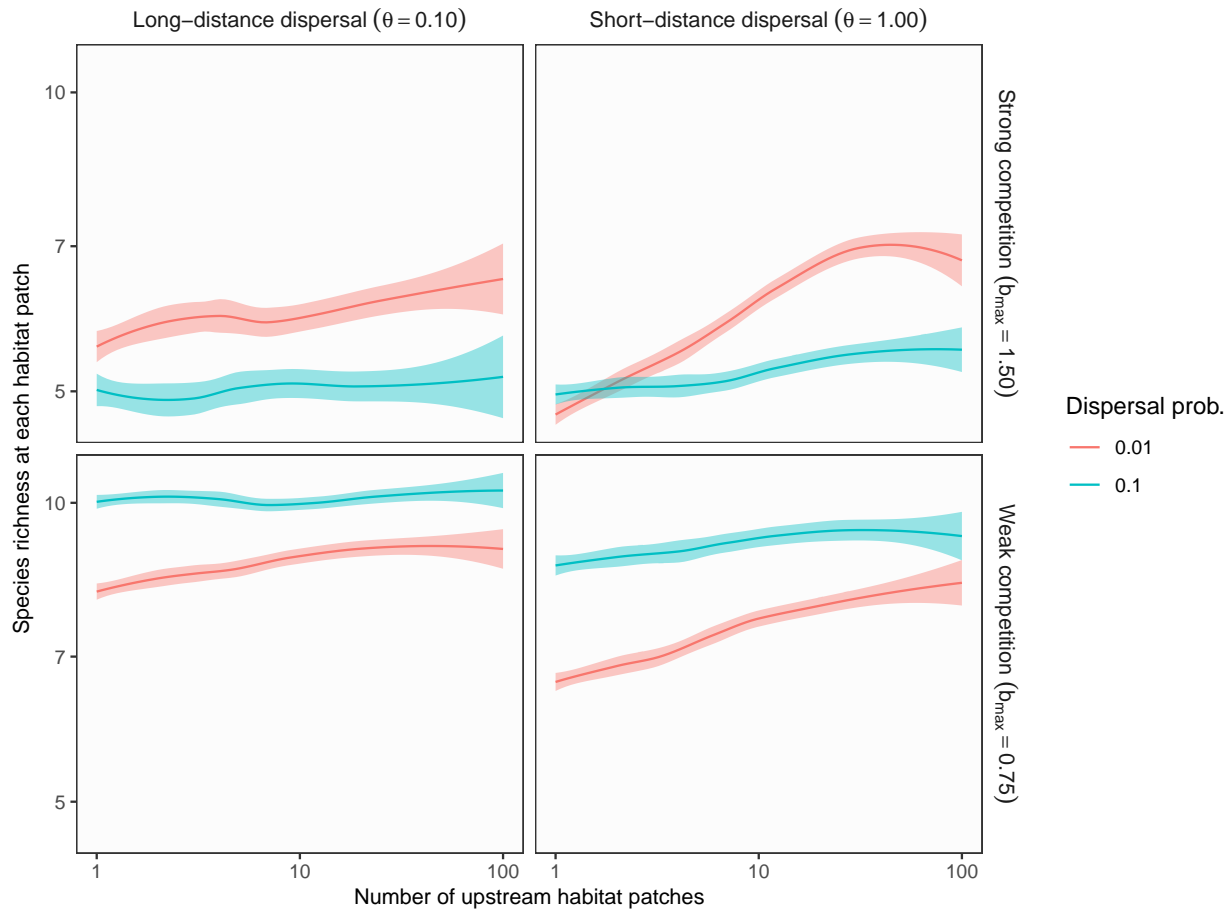

**Figure S3** Theoretical predictions for longitudinal gradients of local species richness in branching networks. The longitudinal position of each habitat patch (x-axis) was expressed as the number of upstream habitat patches. In this simulation, environmental variation at headwaters ( $\sigma_h$ ) is equal to local environmental noise ( $\sigma_l$ ). Lines and shades are loess curves fitted to simulated data and their 95% confidence intervals. Each panel represents different ecological scenarios under which metacommunity dynamics were simulated. Rows represent different competition strength. Competition coefficients ( $b_{ij}$ ) were varied randomly from 0 to 1.5 (top, strong competition) or 0.75 (bottom, weak competition). Columns and lines represent different dispersal scenarios (dispersal distance and probability). Left and right columns show long-distance (the rate parameter of an exponential dispersal kernel  $\theta = 0.10$ ) and short-distance dispersal ( $\theta = 1.0$ ) scenarios respectively. Red and blue lines show low ( $p_d = 0.01$ ) and high dispersal probabilities ( $p_d = 0.10$ ). Other parameters are as follows: environmental variation at headwaters  $\sigma_h = 0.01$ ; local environmental noise  $\sigma_l = 0.01$ ; ecosystem size  $N_p = 100$ ; ecosystem complexity  $P_b = 0.5$ .

**Figure S4** Longitudinal gradient of local species richness ( $\sigma_h = 0.01$ ,  $\sigma_l = 1$ )

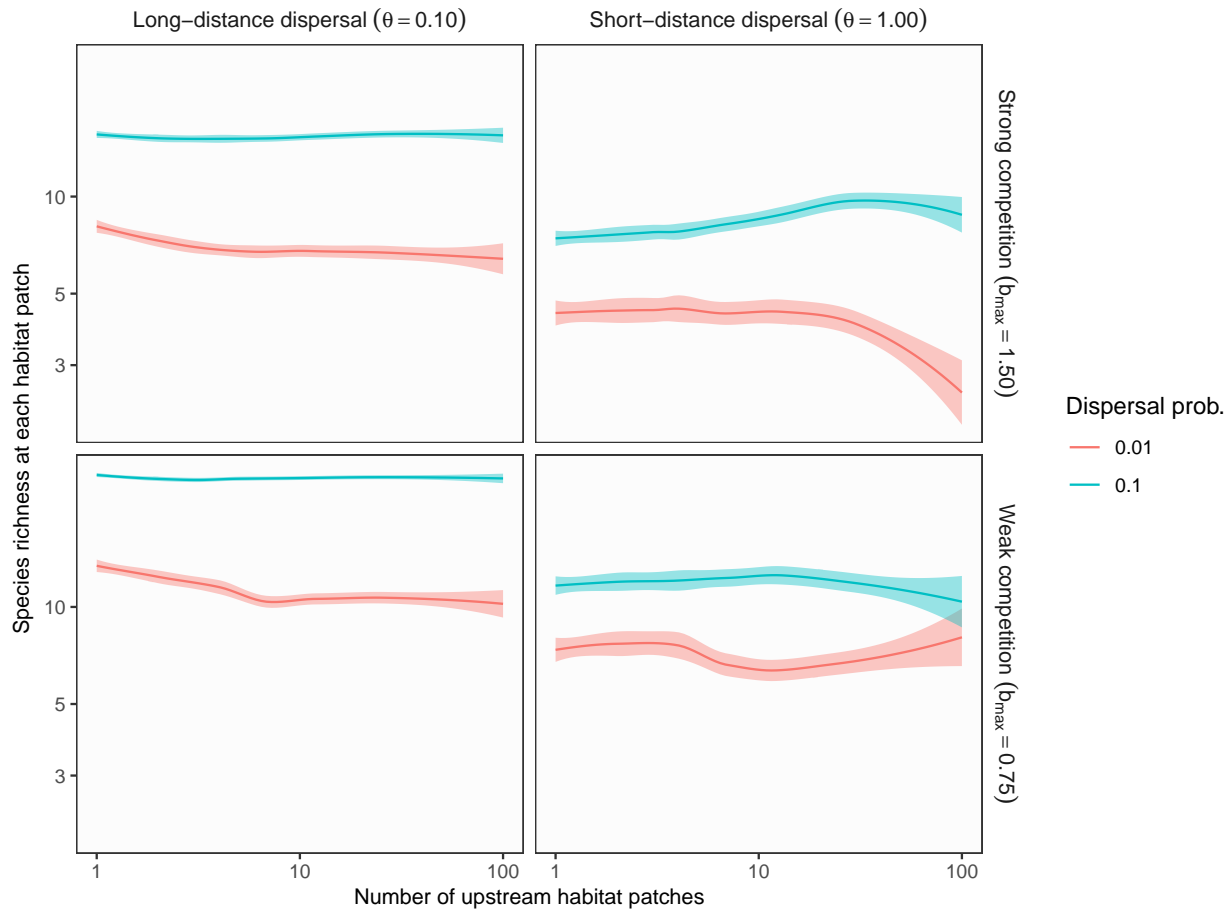

**Figure S4** Theoretical predictions for longitudinal gradients of local species richness in branching networks. The longitudinal position of each habitat patch (x-axis) was expressed as the number of upstream habitat patches. In this simulation, environmental variation at headwaters ( $\sigma_h$ ) is less than local environmental noise ( $\sigma_l$ ). Lines and shades are loess curves fitted to simulated data and their 95% confidence intervals. Each panel represents different ecological scenarios under which metacommunity dynamics were simulated. Rows represent different competition strength. Competition coefficients ( $b_{ij}$ ) were varied randomly from 0 to 1.5 (top, strong competition) or 0.75 (bottom, weak competition). Columns and lines represent different dispersal scenarios (dispersal distance and probability). Left and right columns show long-distance (the rate parameter of an exponential dispersal kernel  $\theta = 0.10$ ) and short-distance dispersal ( $\theta = 1.0$ ) scenarios respectively. Red and blue lines show low ( $p_d = 0.01$ ) and high dispersal probabilities ( $p_d = 0.10$ ). Other parameters are as follows: environmental variation at headwaters  $\sigma_h = 0.01$ ; local environmental noise  $\sigma_l = 1$ ; ecosystem size  $N_p = 100$ ; ecosystem complexity  $P_b = 0.5$ .

**Figure S5 Influence of ecosystem size ( $p_d = 0.1, \sigma_h = 1, \sigma_l = 0.01$ )**

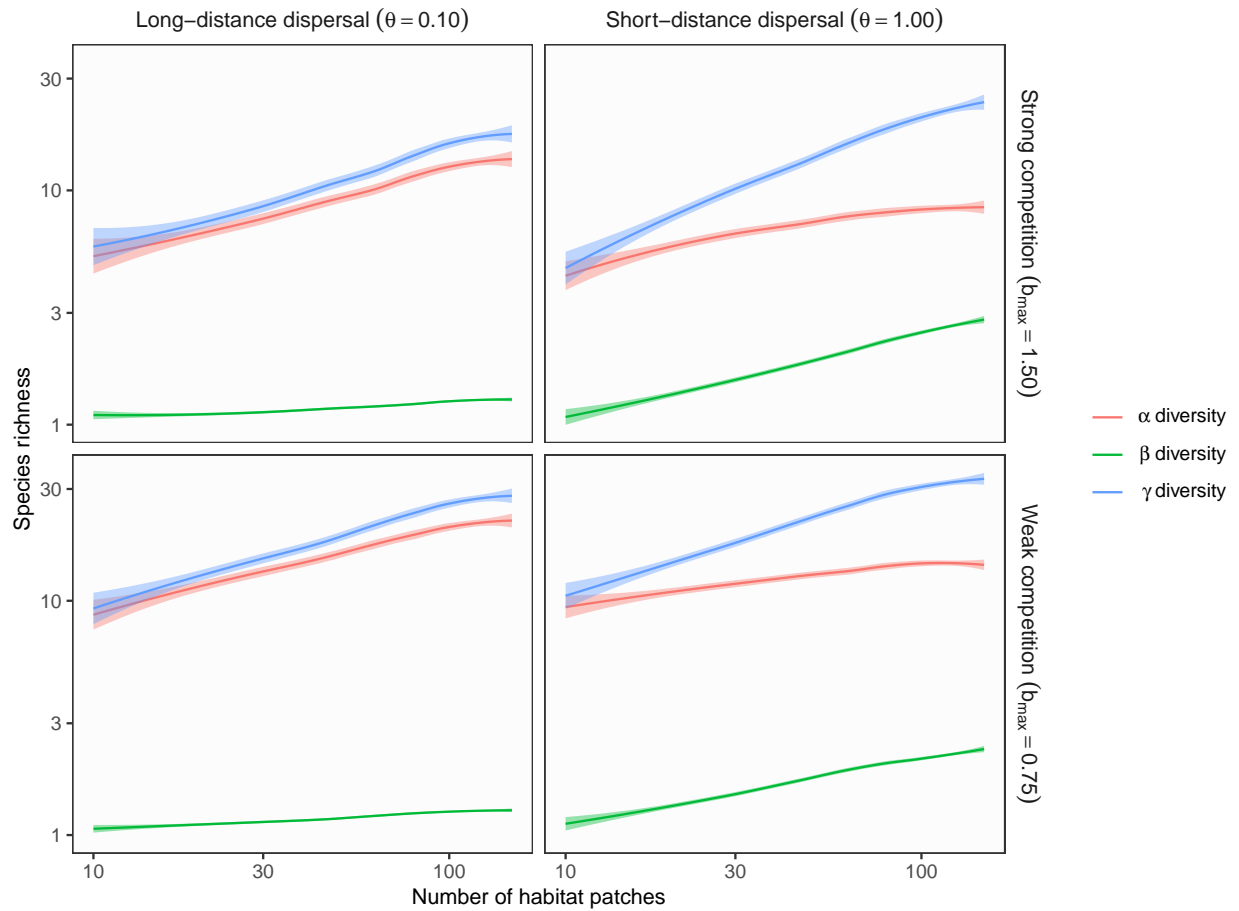

**Figure S5** Theoretical predictions for ecosystem size influences (the number of habitat patches) on  $\alpha$ ,  $\beta$ , and  $\gamma$  diversity in branching networks. In this simulation, environmental variation at headwaters ( $\sigma_h$ ) exceeds local environmental noise ( $\sigma_l$ ). Lines and shades are loess curves fitted to simulated data and their 95% confidence intervals. Each panel represents different ecological scenarios under which metacommunity dynamics were simulated. Rows represent different competition strength. Competition coefficients ( $b_{ij}$ ) were varied randomly from 0 to 1.5 (top, strong competition) or 0.75 (bottom, weak competition). Columns represent different dispersal scenarios. Two dispersal parameters were chosen to simulate scenarios with long-distance (the rate parameter of an exponential dispersal kernel  $\theta = 0.10$ ) and short-distance dispersal ( $\theta = 1.0$ ). Other parameters are as follows: dispersal probability  $p_d = 0.1$ ; environmental variation at headwaters  $\sigma_h = 1$ ; local environmental noise  $\sigma_l = 0.01$ .



**Figure S6 Influence of ecosystem size ( $p_d = 0.1$ ,  $\sigma_h = 1$ ,  $\sigma_l = 1$ )**

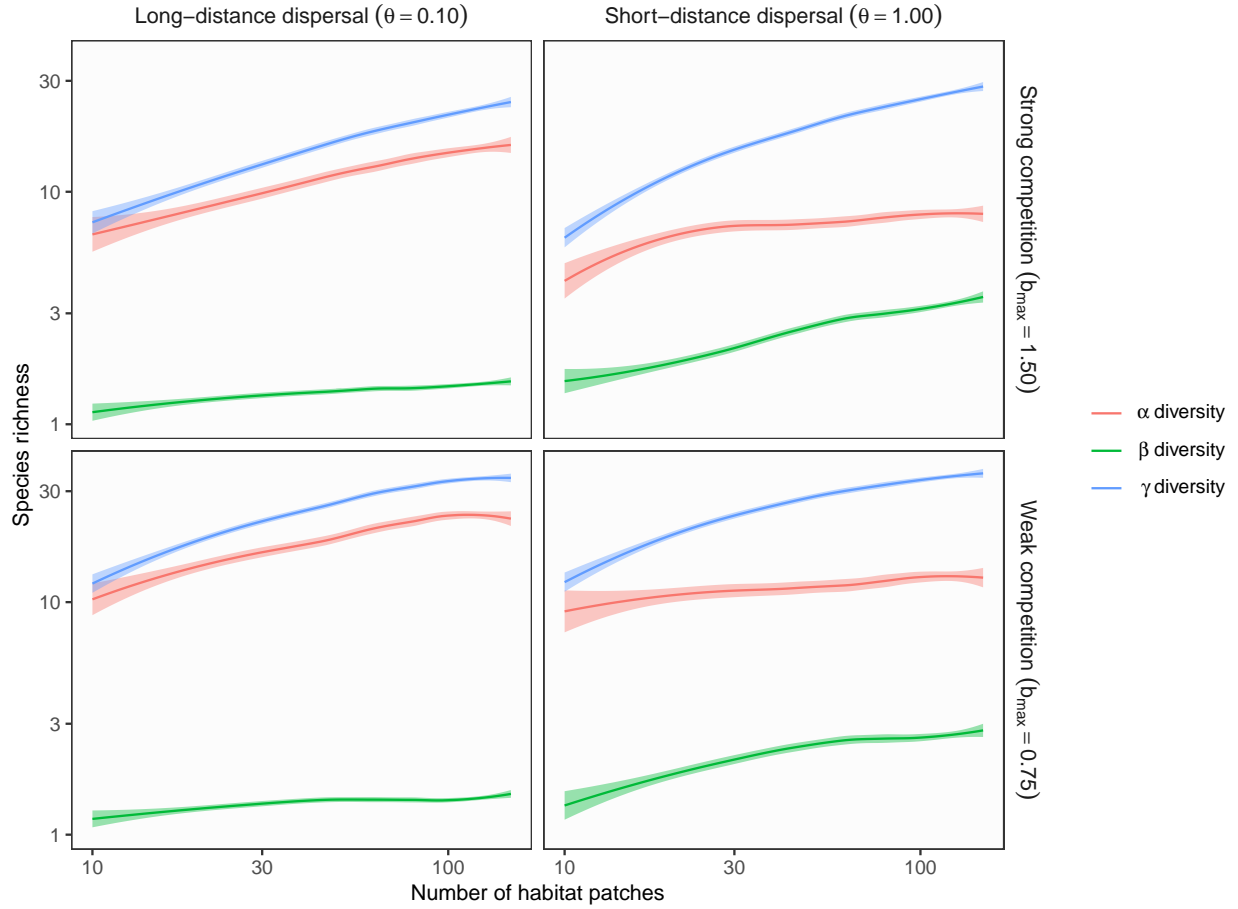

**Figure S6** Theoretical predictions for ecosystem size influences (the number of habitat patches) on  $\alpha$ ,  $\beta$ , and  $\gamma$  diversity in branching networks. In this simulation, environmental variation at headwaters ( $\sigma_h$ ) is equal to local environmental noise ( $\sigma_l$ ). Lines and shades are loess curves fitted to simulated data and their 95% confidence intervals. Each panel represents different ecological scenarios under which metacommunity dynamics were simulated. Rows represent different competition strength. Competition coefficients ( $b_{ij}$ ) were varied randomly from 0 to 1.5 (top, strong competition) or 0.75 (bottom, weak competition). Columns represent different dispersal scenarios. Two dispersal parameters were chosen to simulate scenarios with long-distance (the rate parameter of an exponential dispersal kernel  $\theta = 0.10$ ) and short-distance dispersal ( $\theta = 1.0$ ). Other parameters are as follows: dispersal probability  $p_d = 0.1$ ; environmental variation at headwaters  $\sigma_h = 1$ ; local environmental noise  $\sigma_l = 1$ .

**Figure S7 Influence of ecosystem size ( $p_d = 0.1$ ,  $\sigma_h = 0.01$ ,  $\sigma_l = 0.01$ )**

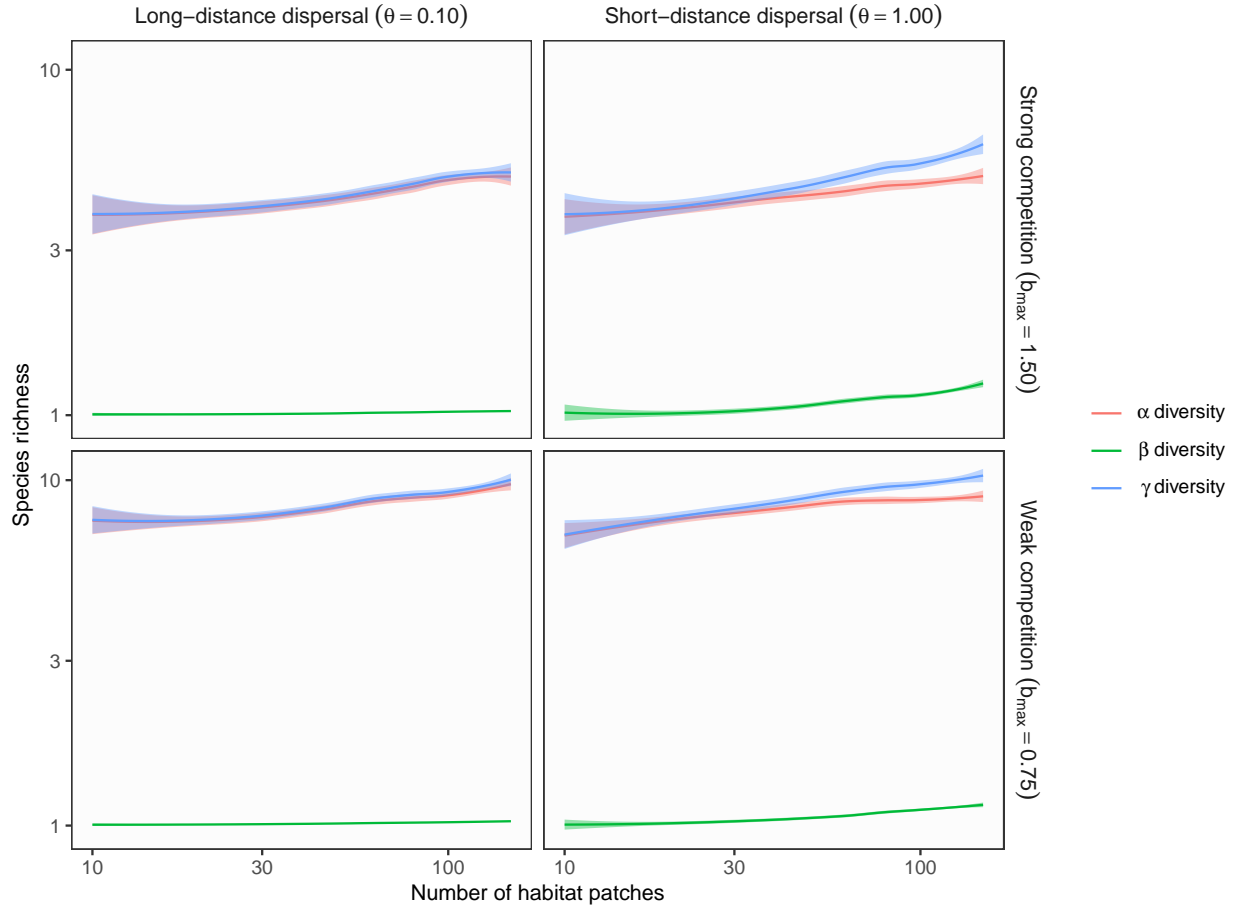

**Figure S7** Theoretical predictions for ecosystem size influences (the number of habitat patches) on  $\alpha$ ,  $\beta$ , and  $\gamma$  diversity in branching networks. In this simulation, environmental variation at headwaters ( $\sigma_h$ ) is equal to local environmental noise ( $\sigma_l$ ). Lines and shades are loess curves fitted to simulated data and their 95% confidence intervals. Each panel represents different ecological scenarios under which metacommunity dynamics were simulated. Rows represent different competition strength. Competition coefficients ( $b_{ij}$ ) were varied randomly from 0 to 1.5 (top, strong competition) or 0.75 (bottom, weak competition). Columns represent different dispersal scenarios. Two dispersal parameters were chosen to simulate scenarios with long-distance (the rate parameter of an exponential dispersal kernel  $\theta = 0.10$ ) and short-distance dispersal ( $\theta = 1.0$ ). Other parameters are as follows: dispersal probability  $p_d = 0.1$ ; environmental variation at headwaters  $\sigma_h = 0.01$ ; local environmental noise  $\sigma_l = 0.01$ .

**Figure S8 Influence of ecosystem size ( $p_d = 0.1$ ,  $\sigma_h = 0.01$ ,  $\sigma_l = 1$ )**

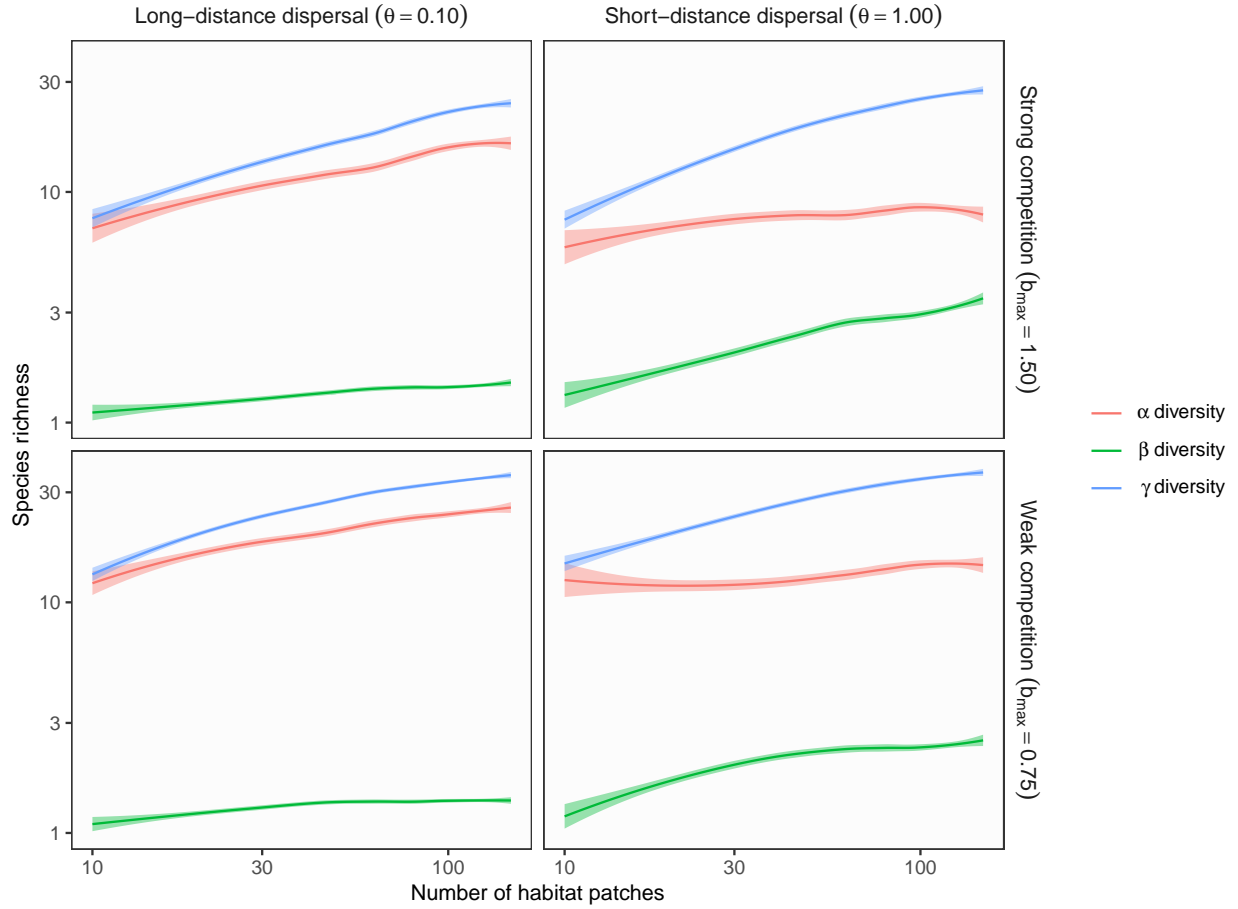

**Figure S8** Theoretical predictions for ecosystem size influences (the number of habitat patches) on  $\alpha$ ,  $\beta$ , and  $\gamma$  diversity in branching networks. In this simulation, environmental variation at headwaters ( $\sigma_h$ ) is less than local environmental noise ( $\sigma_l$ ). Lines and shades are loess curves fitted to simulated data and their 95% confidence intervals. Each panel represents different ecological scenarios under which metacommunity dynamics were simulated. Rows represent different competition strength. Competition coefficients ( $b_{ij}$ ) were varied randomly from 0 to 1.5 (top, strong competition) or 0.75 (bottom, weak competition). Columns represent different dispersal scenarios. Two dispersal parameters were chosen to simulate scenarios with long-distance (the rate parameter of an exponential dispersal kernel  $\theta = 0.10$ ) and short-distance dispersal ( $\theta = 1.0$ ). Other parameters are as follows: dispersal probability  $p_d = 0.1$ ; environmental variation at headwaters  $\sigma_h = 0.01$ ; local environmental noise  $\sigma_l = 1$ .

**Figure S9 Influence of ecosystem size ( $p_d = 0.01$ ,  $\sigma_h = 1$ ,  $\sigma_l = 1$ )**

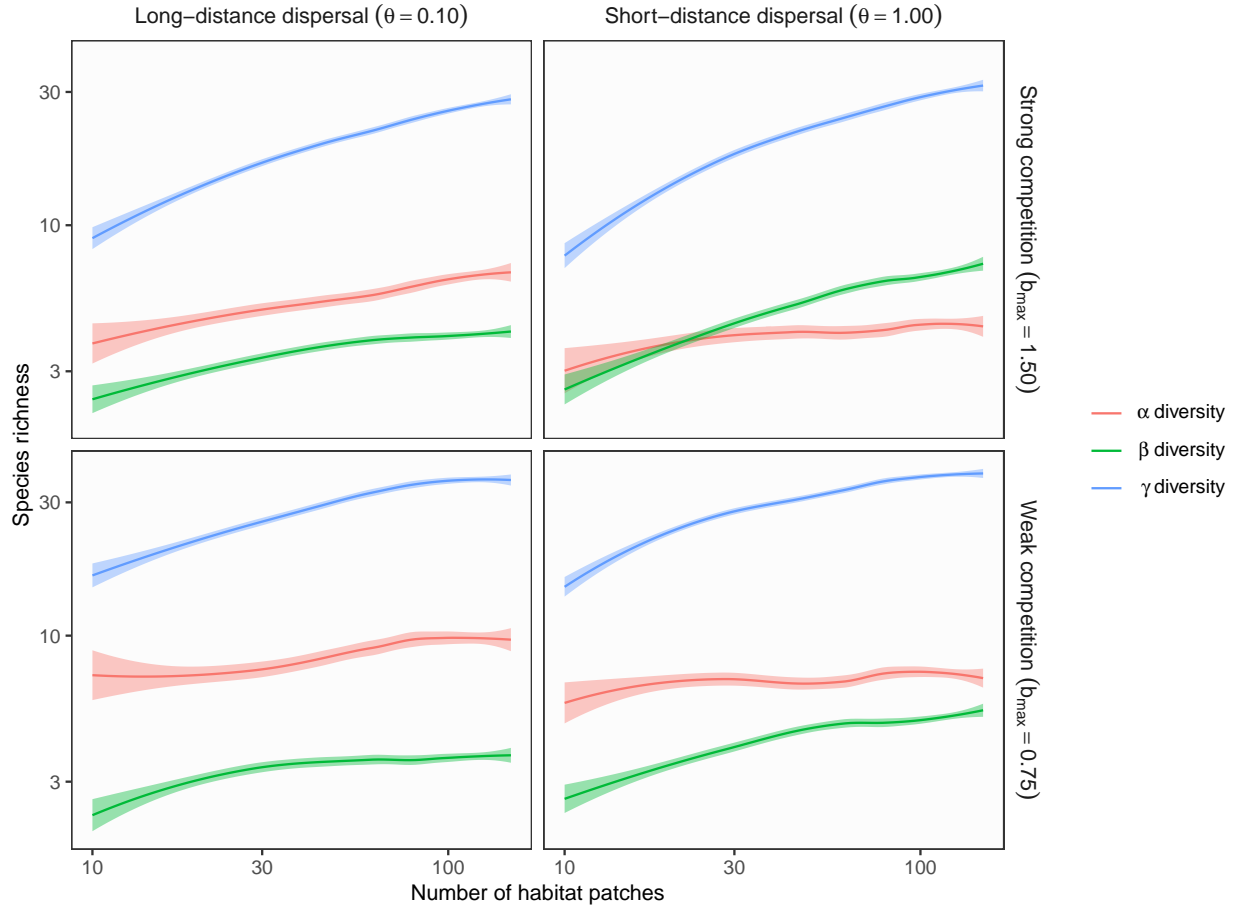

**Figure S9** Theoretical predictions for ecosystem size influences (the number of habitat patches) on  $\alpha$ ,  $\beta$ , and  $\gamma$  diversity in branching networks. In this simulation, environmental variation at headwaters ( $\sigma_h$ ) is equal to local environmental noise ( $\sigma_l$ ). Lines and shades are loess curves fitted to simulated data and their 95% confidence intervals. Each panel represents different ecological scenarios under which metacommunity dynamics were simulated. Rows represent different competition strength. Competition coefficients ( $b_{ij}$ ) were varied randomly from 0 to 1.5 (top, strong competition) or 0.75 (bottom, weak competition). Columns represent different dispersal scenarios. Two dispersal parameters were chosen to simulate scenarios with long-distance (the rate parameter of an exponential dispersal kernel  $\theta = 0.10$ ) and short-distance dispersal ( $\theta = 1.0$ ). Other parameters are as follows: dispersal probability  $p_d = 0.01$ ; environmental variation at headwaters  $\sigma_h = 1$ ; local environmental noise  $\sigma_l = 1$ .

**Figure S10 Influence of ecosystem size ( $p_d = 0.01$ ,  $\sigma_h = 0.01$ ,  $\sigma_l = 0.01$ )**

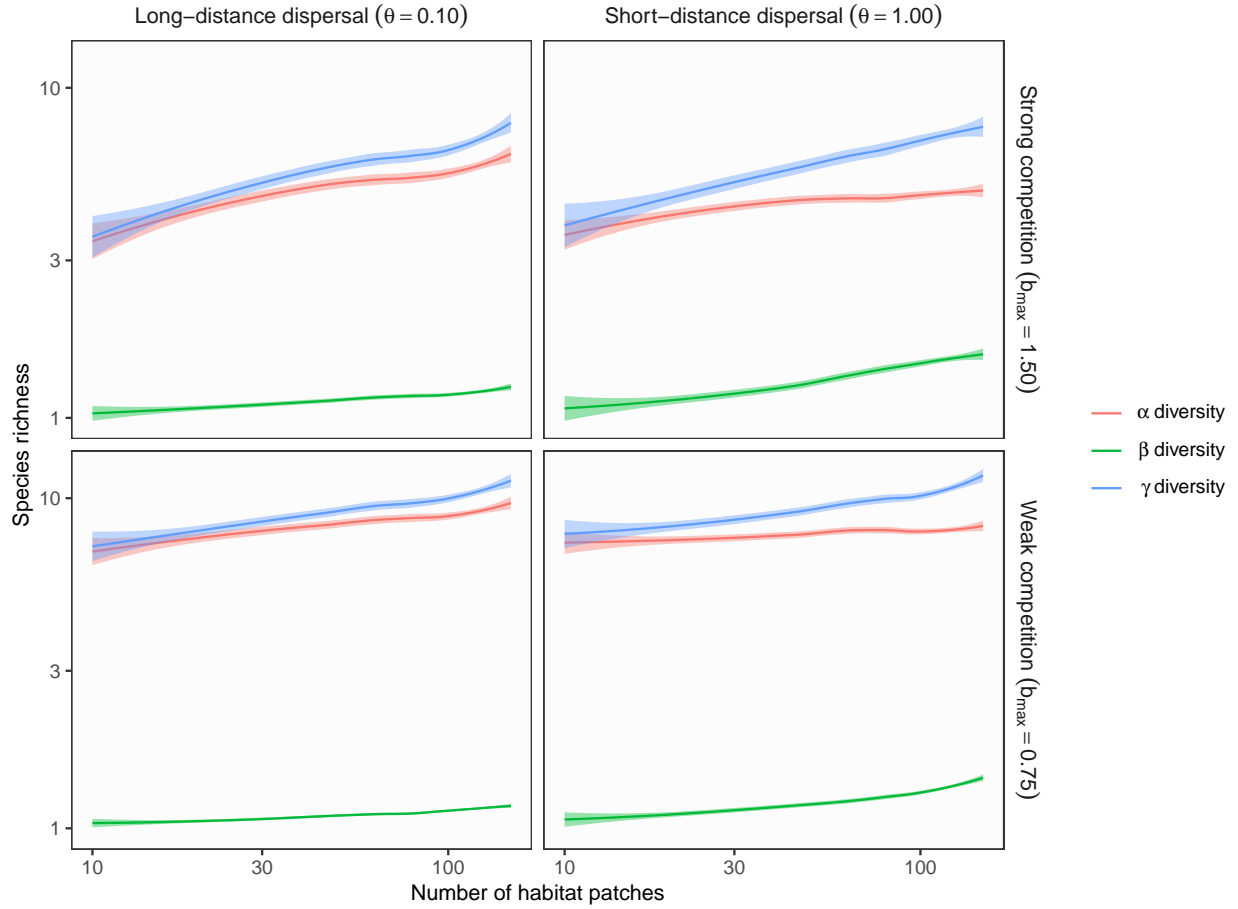

**Figure S10** Theoretical predictions for ecosystem size influences (the number of habitat patches) on  $\alpha$ ,  $\beta$ , and  $\gamma$  diversity in branching networks. In this simulation, environmental variation at headwaters ( $\sigma_h$ ) is equal to local environmental noise ( $\sigma_l$ ). Lines and shades are loess curves fitted to simulated data and their 95% confidence intervals. Each panel represents different ecological scenarios under which metacommunity dynamics were simulated. Rows represent different competition strength. Competition coefficients ( $b_{ij}$ ) were varied randomly from 0 to 1.5 (top, strong competition) or 0.75 (bottom, weak competition). Columns represent different dispersal scenarios. Two dispersal parameters were chosen to simulate scenarios with long-distance (the rate parameter of an exponential dispersal kernel  $\theta = 0.10$ ) and short-distance dispersal ( $\theta = 1.0$ ). Other parameters are as follows: dispersal probability  $p_d = 0.01$ ; environmental variation at headwaters  $\sigma_h = 0.01$ ; local environmental noise  $\sigma_l = 0.01$ .

**Figure S11 Influence of ecosystem size ( $p_d = 0.01$ ,  $\sigma_h = 0.01$ ,  $\sigma_l = 1$ )**

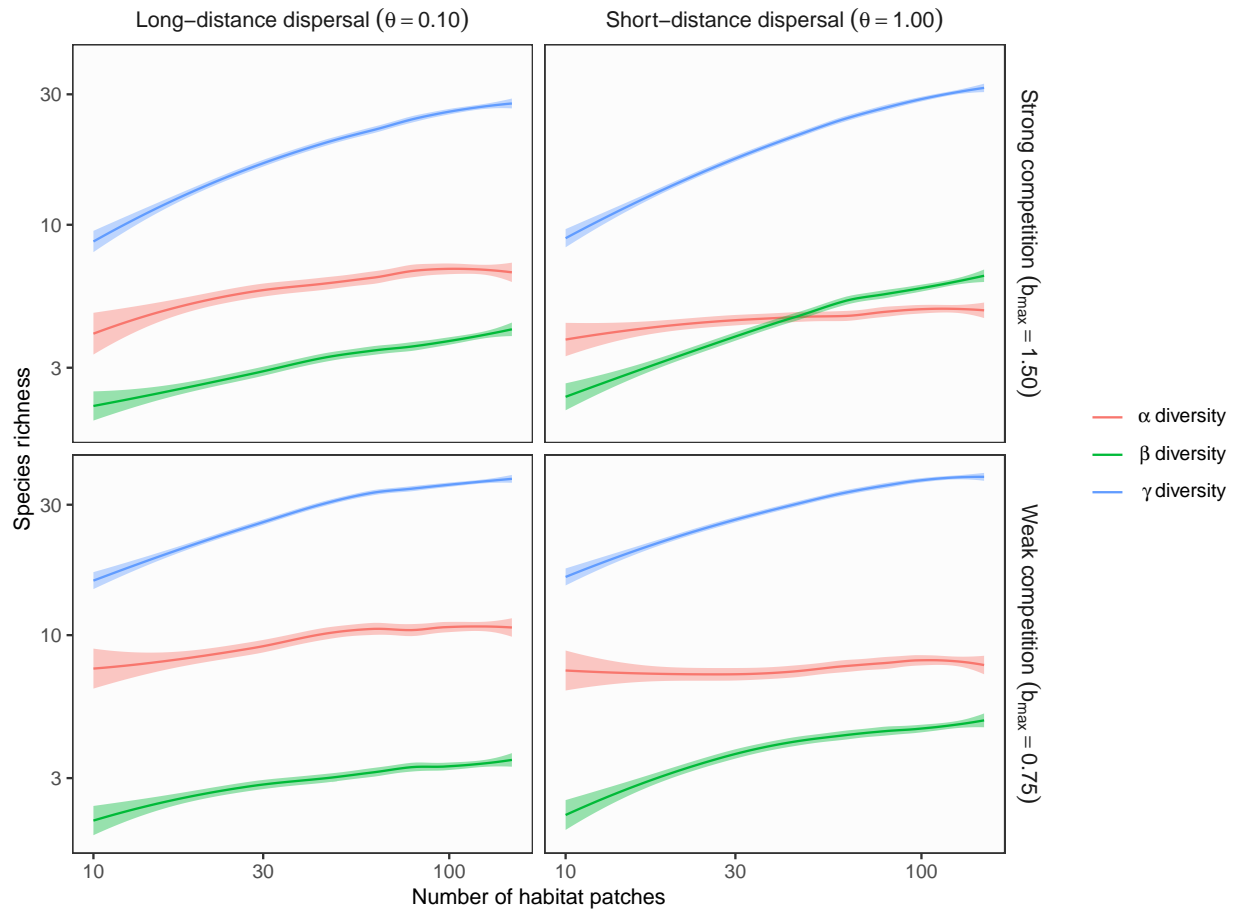

**Figure S11** Theoretical predictions for ecosystem size influences (the number of habitat patches) on  $\alpha$ ,  $\beta$ , and  $\gamma$  diversity in branching networks. In this simulation, environmental variation at headwaters ( $\sigma_h$ ) is less than local environmental noise ( $\sigma_l$ ). Lines and shades are loess curves fitted to simulated data and their 95% confidence intervals. Each panel represents different ecological scenarios under which metacommunity dynamics were simulated. Rows represent different competition strength. Competition coefficients ( $b_{ij}$ ) were varied randomly from 0 to 1.5 (top, strong competition) or 0.75 (bottom, weak competition). Columns represent different dispersal scenarios. Two dispersal parameters were chosen to simulate scenarios with long-distance (the rate parameter of an exponential dispersal kernel  $\theta = 0.10$ ) and short-distance dispersal ( $\theta = 1.0$ ). Other parameters are as follows: dispersal probability  $p_d = 0.01$ ; environmental variation at headwaters  $\sigma_h = 0.01$ ; local environmental noise  $\sigma_l = 1$ .

**Figure S12 Influence of ecosystem complexity ( $p_d = 0.1$ ,  $\sigma_h = 1$ ,  $\sigma_l = 0.01$ )**

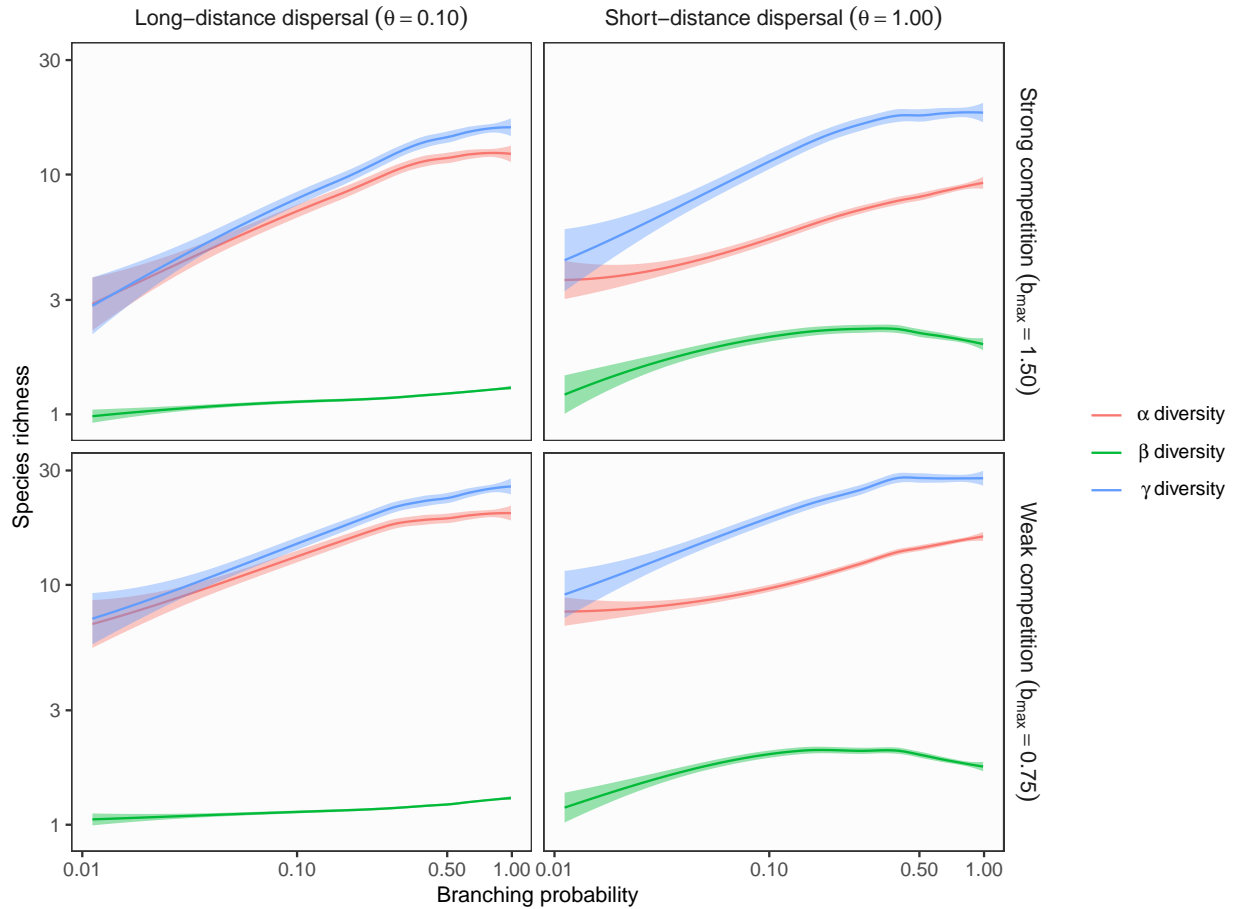

**Figure S12** Theoretical predictions for ecosystem complexity influences (branching probability) on  $\alpha$ ,  $\beta$ , and  $\gamma$  diversity in branching networks. In this simulation, environmental variation at headwaters ( $\sigma_h$ ) exceeds local environmental noise ( $\sigma_l$ ). Lines and shades are loess curves fitted to simulated data and their 95% confidence intervals. Each panel represents different ecological scenarios under which metacommunity dynamics were simulated. Rows represent different competition strength. Competition coefficients ( $b_{ij}$ ) were varied randomly from 0 to 1.5 (top, strong competition) or 0.75 (bottom, weak competition). Columns represent different dispersal scenarios. Two dispersal parameters were chosen to simulate scenarios with long-distance (the rate parameter of an exponential dispersal kernel  $\theta = 0.10$ ) and short-distance dispersal ( $\theta = 1.0$ ). Other parameters are as follows: dispersal probability  $p_d = 0.1$ ; environmental variation at headwaters  $\sigma_h = 1$ ; local environmental noise  $\sigma_l = 0.01$ .

**Figure S13 Influence of ecosystem complexity ( $p_d = 0.1$ ,  $\sigma_h = 1$ ,  $\sigma_l = 1$ )**

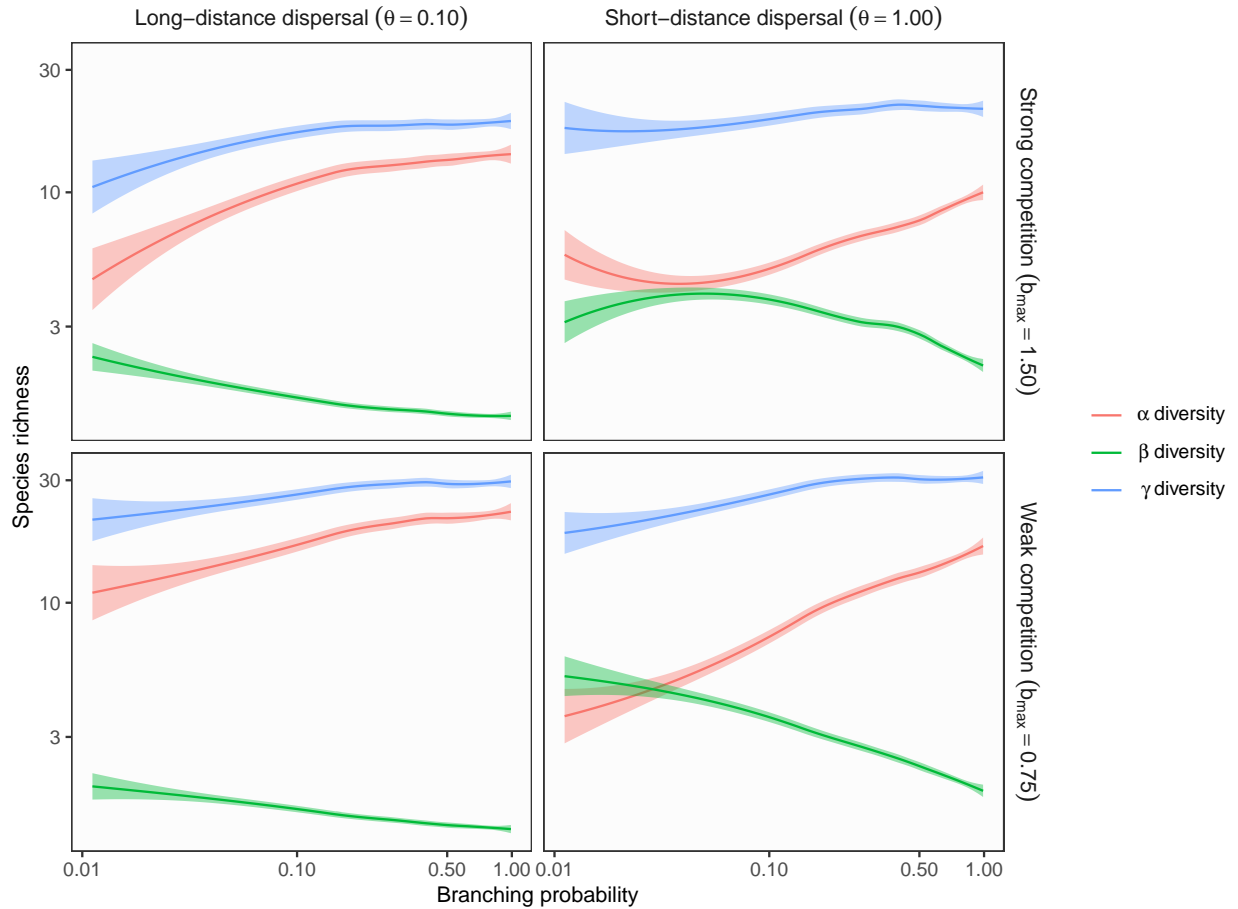

**Figure S13** Theoretical predictions for ecosystem complexity influences (branching probability) on  $\alpha$ ,  $\beta$ , and  $\gamma$  diversity in branching networks. In this simulation, environmental variation at headwaters ( $\sigma_h$ ) is equal to local environmental noise ( $\sigma_l$ ). Lines and shades are loess curves fitted to simulated data and their 95% confidence intervals. Each panel represents different ecological scenarios under which metacommunity dynamics were simulated. Rows represent different competition strength. Competition coefficients ( $b_{ij}$ ) were varied randomly from 0 to 1.5 (top, strong competition) or 0.75 (bottom, weak competition). Columns represent different dispersal scenarios. Two dispersal parameters were chosen to simulate scenarios with long-distance (the rate parameter of an exponential dispersal kernel  $\theta = 0.10$ ) and short-distance dispersal ( $\theta = 1.0$ ). Other parameters are as follows: dispersal probability  $p_d = 0.1$ ; environmental variation at headwaters  $\sigma_h = 1$ ; local environmental noise  $\sigma_l = 1$ .



**Figure S14 Influence of ecosystem complexity** ( $p_d = 0.1$ ,  $\sigma_h = 0.01$ ,  $\sigma_l = 0.01$ )

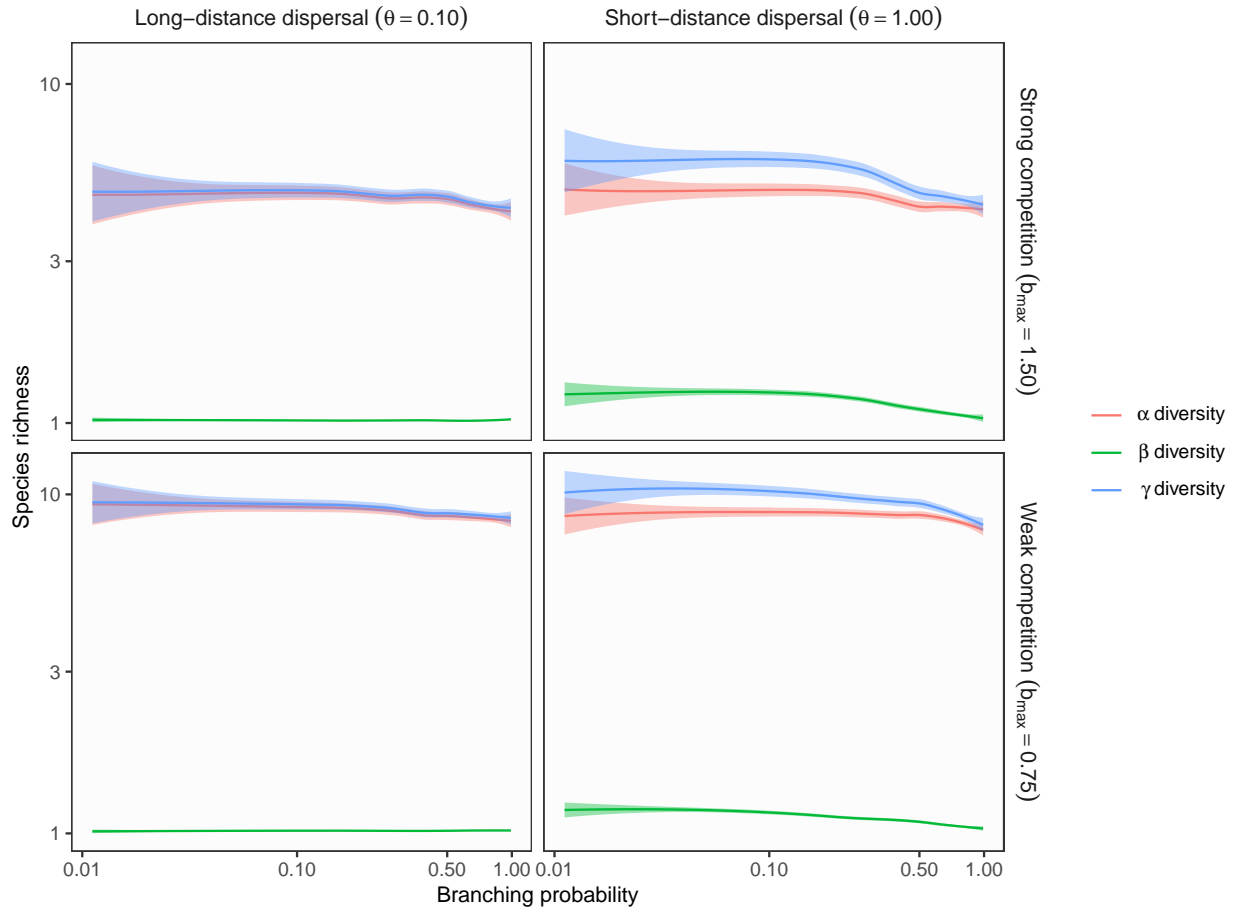

**Figure S14** Theoretical predictions for ecosystem complexity influences (branching probability) on  $\alpha$ ,  $\beta$ , and  $\gamma$  diversity in branching networks. In this simulation, environmental variation at headwaters ( $\sigma_h$ ) is equal to local environmental noise ( $\sigma_l$ ). Lines and shades are loess curves fitted to simulated data and their 95% confidence intervals. Each panel represents different ecological scenarios under which metacommunity dynamics were simulated. Rows represent different competition strength. Competition coefficients ( $b_{ij}$ ) were varied randomly from 0 to 1.5 (top, strong competition) or 0.75 (bottom, weak competition). Columns represent different dispersal scenarios. Two dispersal parameters were chosen to simulate scenarios with long-distance (the rate parameter of an exponential dispersal kernel  $\theta = 0.10$ ) and short-distance dispersal ( $\theta = 1.0$ ). Other parameters are as follows: dispersal probability  $p_d = 0.1$ ; environmental variation at headwaters  $\sigma_h = 0.01$ ; local environmental noise  $\sigma_l = 0.01$ .

**Figure S15 Influence of ecosystem complexity** ( $p_d = 0.1$ ,  $\sigma_h = 0.01$ ,  $\sigma_l = 1$ )

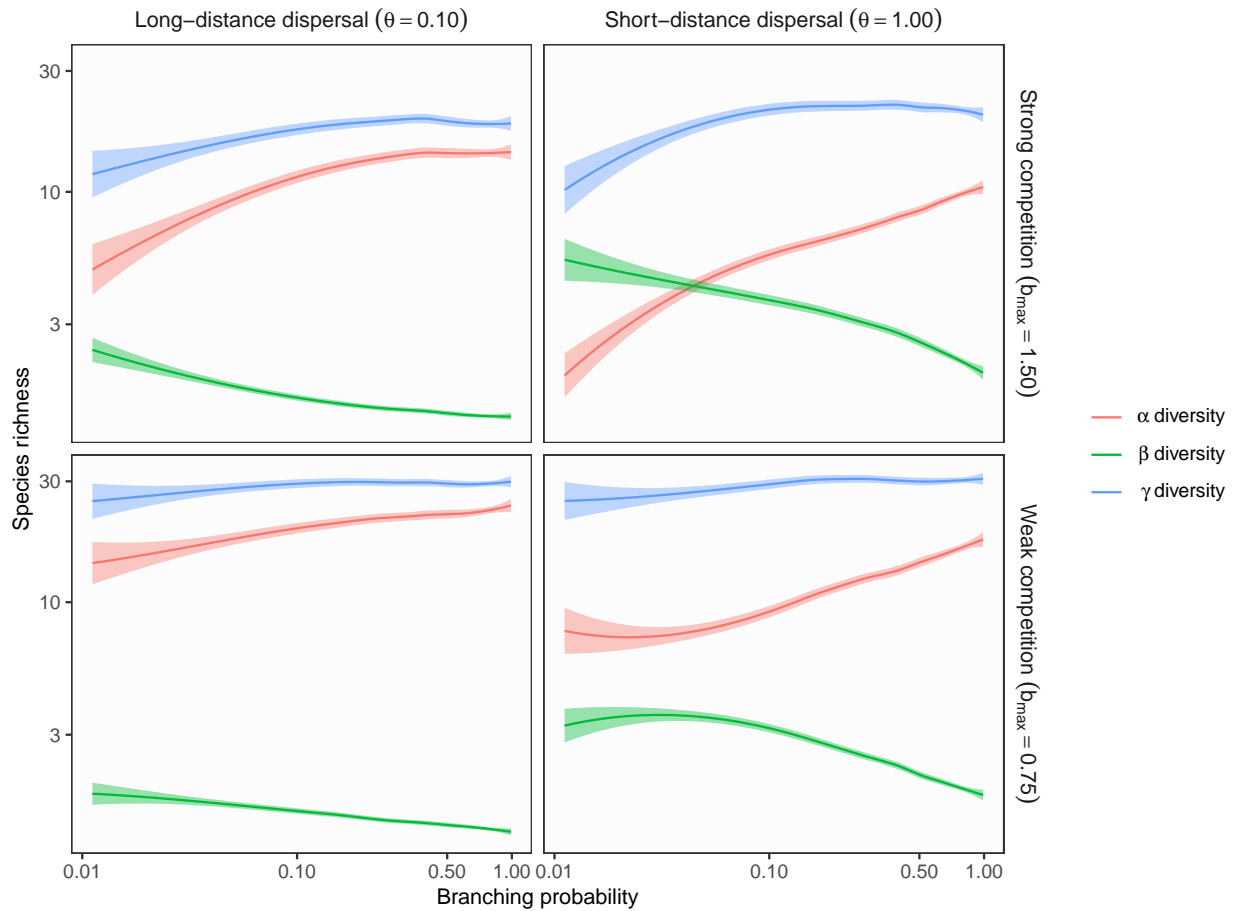

**Figure S15** Theoretical predictions for ecosystem complexity influences (branching probability) on  $\alpha$ ,  $\beta$ , and  $\gamma$  diversity in branching networks. In this simulation, environmental variation at headwaters ( $\sigma_h$ ) is less than local environmental noise ( $\sigma_l$ ). Lines and shades are loess curves fitted to simulated data and their 95% confidence intervals. Each panel represents different ecological scenarios under which metacommunity dynamics were simulated. Rows represent different competition strength. Competition coefficients ( $b_{ij}$ ) were varied randomly from 0 to 1.5 (top, strong competition) or 0.75 (bottom, weak competition). Columns represent different dispersal scenarios. Two dispersal parameters were chosen to simulate scenarios with long-distance (the rate parameter of an exponential dispersal kernel  $\theta = 0.10$ ) and short-distance dispersal ( $\theta = 1.0$ ). Other parameters are as follows: dispersal probability  $p_d = 0.1$ ; environmental variation at headwaters  $\sigma_h = 0.01$ ; local environmental noise  $\sigma_l = 1$ .

**Figure S16 Influence of ecosystem complexity ( $p_d = 0.01$ ,  $\sigma_h = 1$ ,  $\sigma_l = 1$ )**

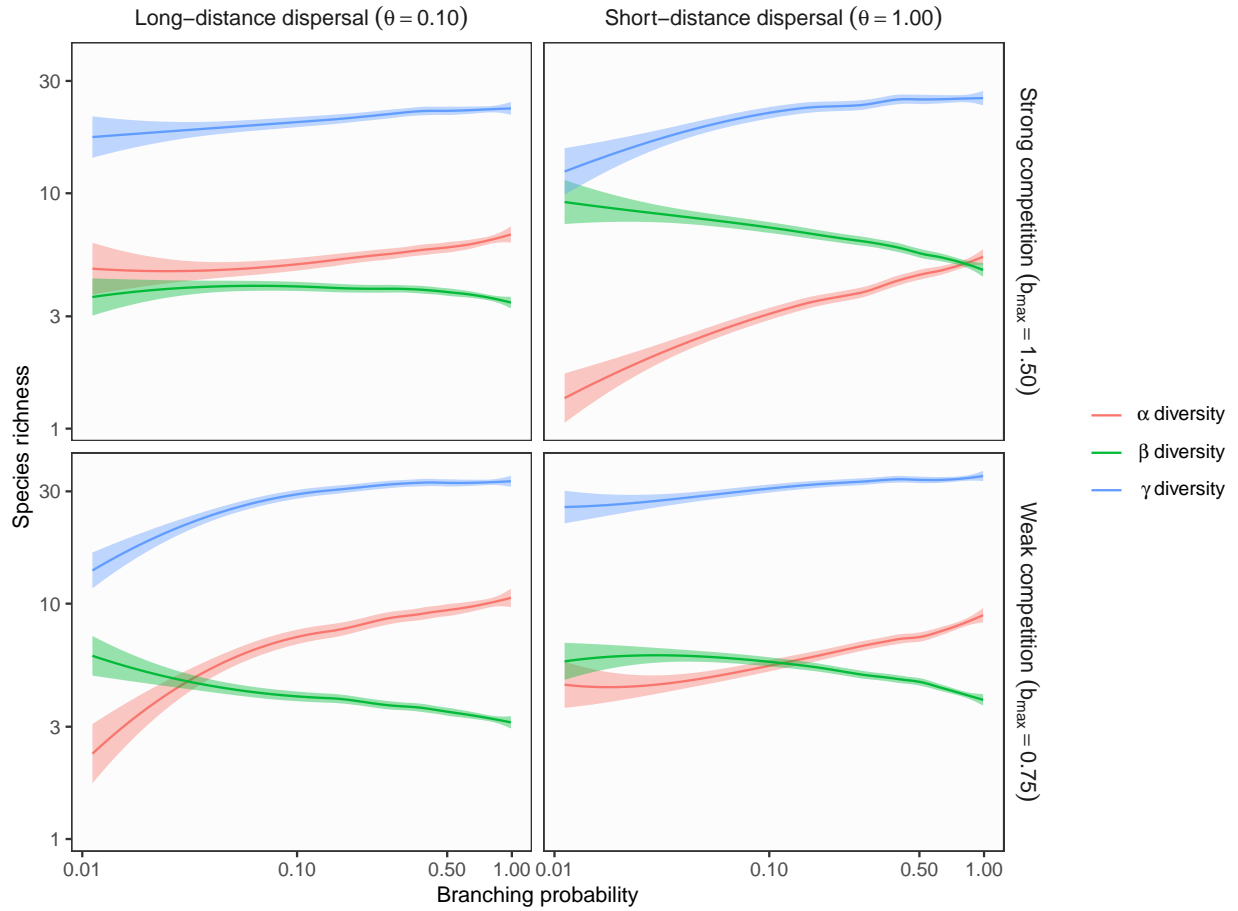

**Figure S16** Theoretical predictions for ecosystem complexity influences (branching probability) on  $\alpha$ ,  $\beta$ , and  $\gamma$  diversity in branching networks. In this simulation, environmental variation at headwaters ( $\sigma_h$ ) is equal to local environmental noise ( $\sigma_l$ ). Lines and shades are loess curves fitted to simulated data and their 95% confidence intervals. Each panel represents different ecological scenarios under which metacommunity dynamics were simulated. Rows represent different competition strength. Competition coefficients ( $b_{ij}$ ) were varied randomly from 0 to 1.5 (top, strong competition) or 0.75 (bottom, weak competition). Columns represent different dispersal scenarios. Two dispersal parameters were chosen to simulate scenarios with long-distance (the rate parameter of an exponential dispersal kernel  $\theta = 0.10$ ) and short-distance dispersal ( $\theta = 1.0$ ). Other parameters are as follows: dispersal probability  $p_d = 0.01$ ; environmental variation at headwaters  $\sigma_h = 1$ ; local environmental noise  $\sigma_l = 1$ .

**Figure S17 Influence of ecosystem complexity** ( $p_d = 0.01$ ,  $\sigma_h = 0.01$ ,  $\sigma_l = 0.01$ )

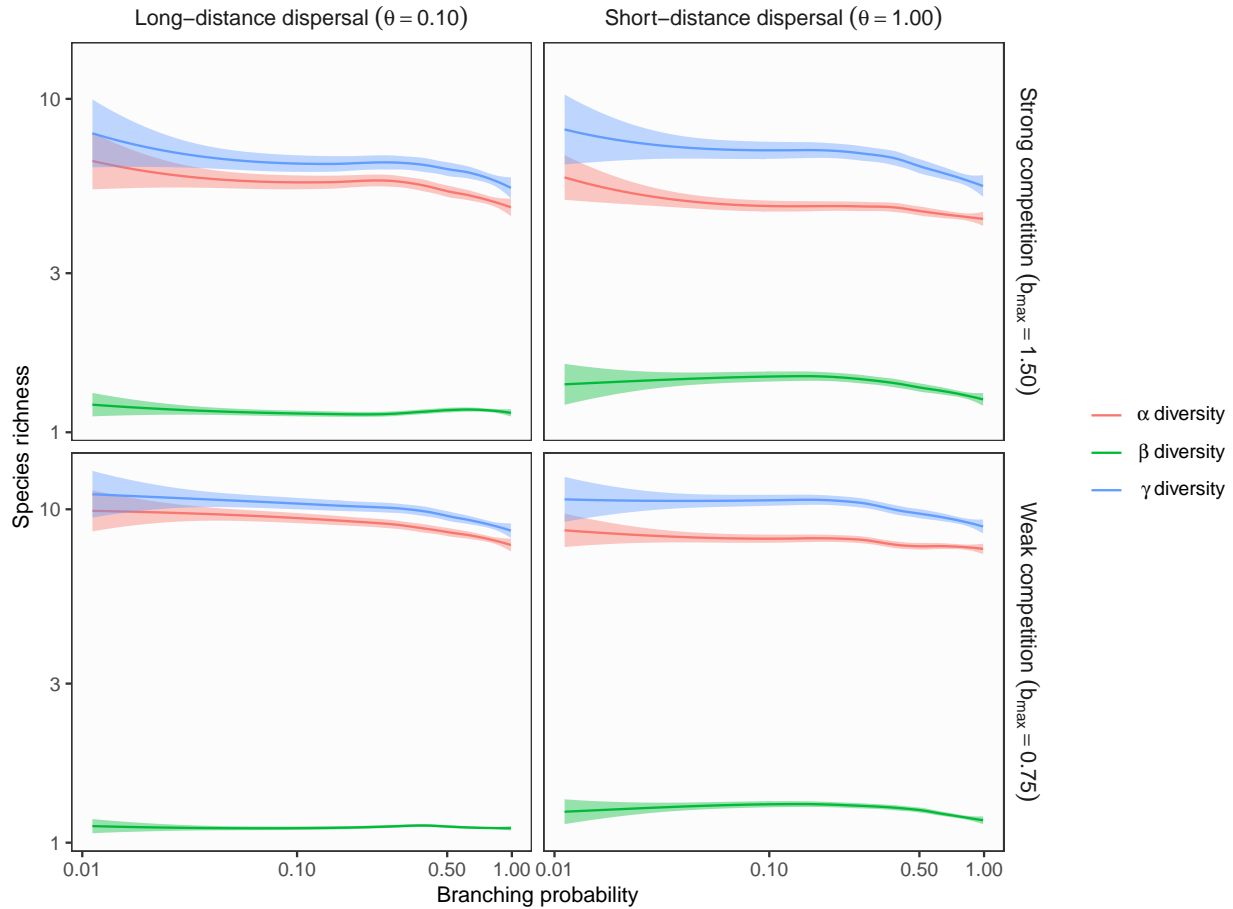

**Figure S17** Theoretical predictions for ecosystem complexity influences (branching probability) on  $\alpha$ ,  $\beta$ , and  $\gamma$  diversity in branching networks. In this simulation, environmental variation at headwaters ( $\sigma_h$ ) is equal to local environmental noise ( $\sigma_l$ ). Lines and shades are loess curves fitted to simulated data and their 95% confidence intervals. Each panel represents different ecological scenarios under which metacommunity dynamics were simulated. Rows represent different competition strength. Competition coefficients ( $b_{ij}$ ) were varied randomly from 0 to 1.5 (top, strong competition) or 0.75 (bottom, weak competition). Columns represent different dispersal scenarios. Two dispersal parameters were chosen to simulate scenarios with long-distance (the rate parameter of an exponential dispersal kernel  $\theta = 0.10$ ) and short-distance dispersal ( $\theta = 1.0$ ). Other parameters are as follows: dispersal probability  $p_d = 0.01$ ; environmental variation at headwaters  $\sigma_h = 0.01$ ; local environmental noise  $\sigma_l = 0.01$ .

**Figure S18 Influence of ecosystem complexity** ( $p_d = 0.01$ ,  $\sigma_h = 0.01$ ,  $\sigma_l = 1$ )

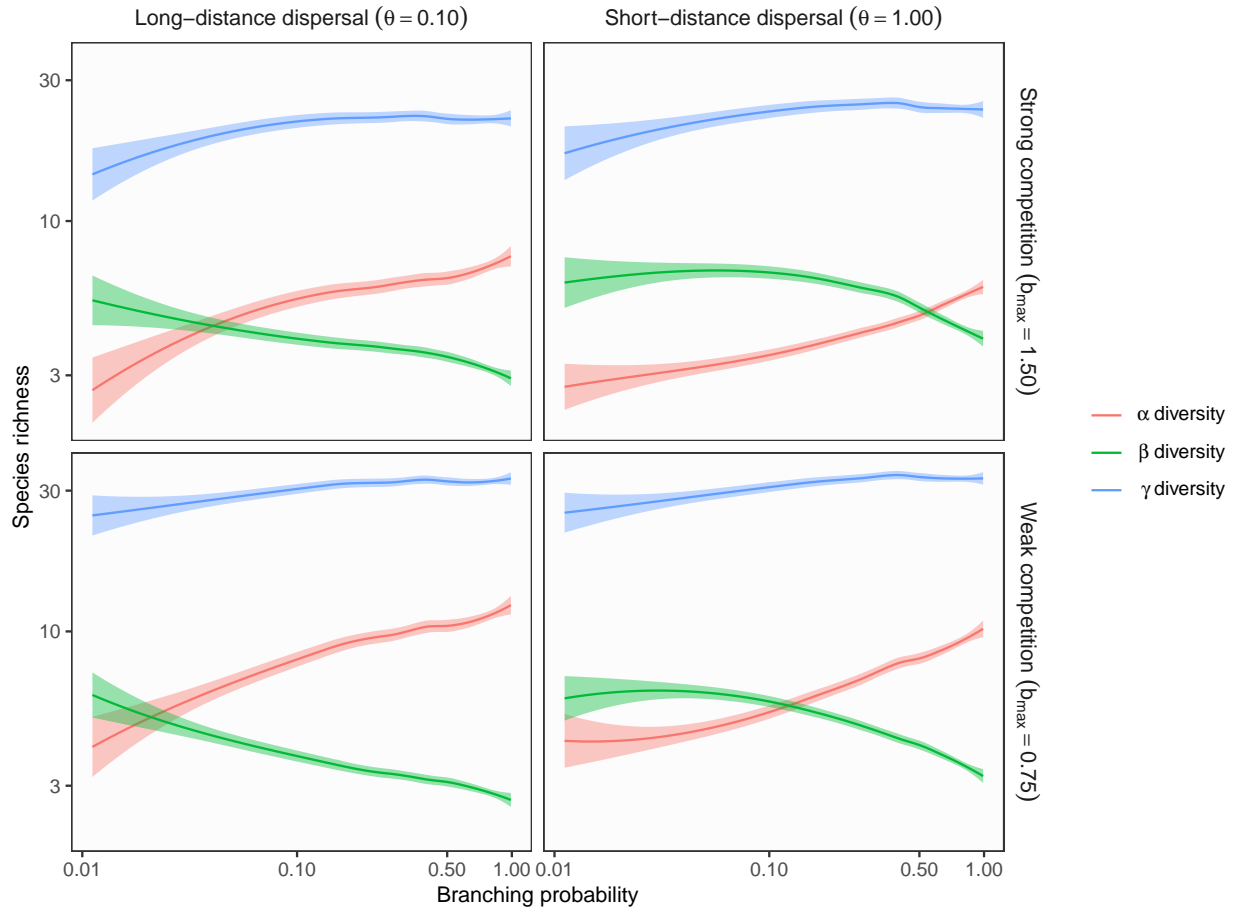

**Figure S18** Theoretical predictions for ecosystem complexity influences (branching probability) on  $\alpha$ ,  $\beta$ , and  $\gamma$  diversity in branching networks. In this simulation, environmental variation at headwaters ( $\sigma_h$ ) is less than local environmental noise ( $\sigma_l$ ). Lines and shades are loess curves fitted to simulated data and their 95% confidence intervals. Each panel represents different ecological scenarios under which metacommunity dynamics were simulated. Rows represent different competition strength. Competition coefficients ( $b_{ij}$ ) were varied randomly from 0 to 1.5 (top, strong competition) or 0.75 (bottom, weak competition). Columns represent different dispersal scenarios. Two dispersal parameters were chosen to simulate scenarios with long-distance (the rate parameter of an exponential dispersal kernel  $\theta = 0.10$ ) and short-distance dispersal ( $\theta = 1.0$ ). Other parameters are as follows: dispersal probability  $p_d = 0.01$ ; environmental variation at headwaters  $\sigma_h = 0.01$ ; local environmental noise  $\sigma_l = 1$ .

**Figure S19** Correlation structure of explanatory variables

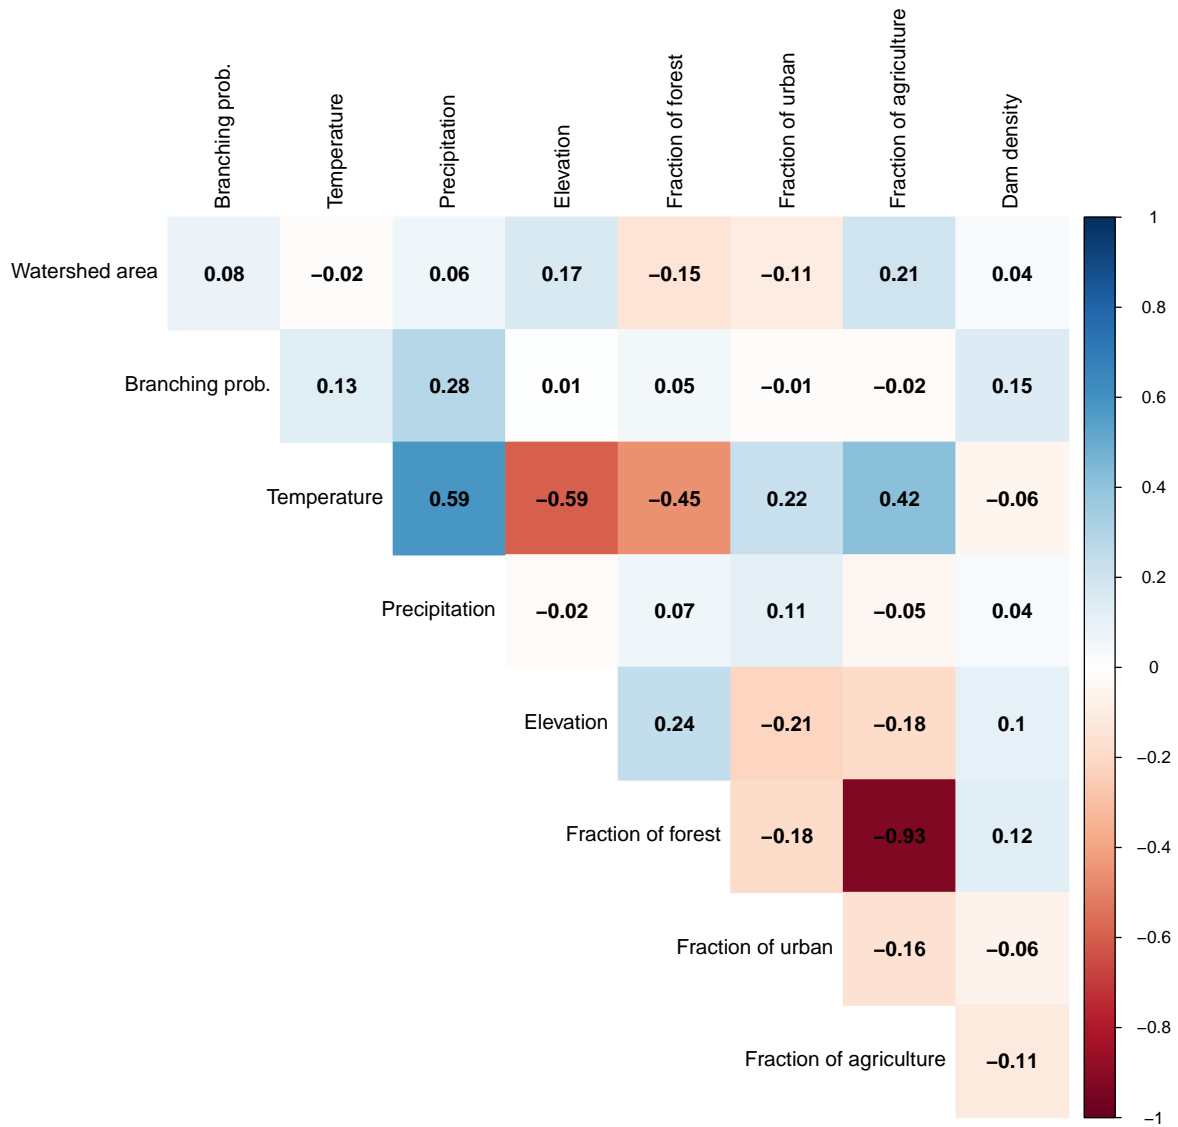

**Figure S19** Correlation structure of potential explanatory variables for riverine diversity metrics. Numeric values in each cell are the Pearson’s correlation coefficients. Positive and negative correlations were colored in blue and red, respectively, and darker colors indicate stronger correlations. Environmental variables (temperature, precipitation, elevation, fraction of forest, fraction of urban, fraction of agriculture, and dam density) were expressed as deviations from the regional averages to remove any regional effects.

Figure S20 Sensitivity analysis of asymptotic species richness

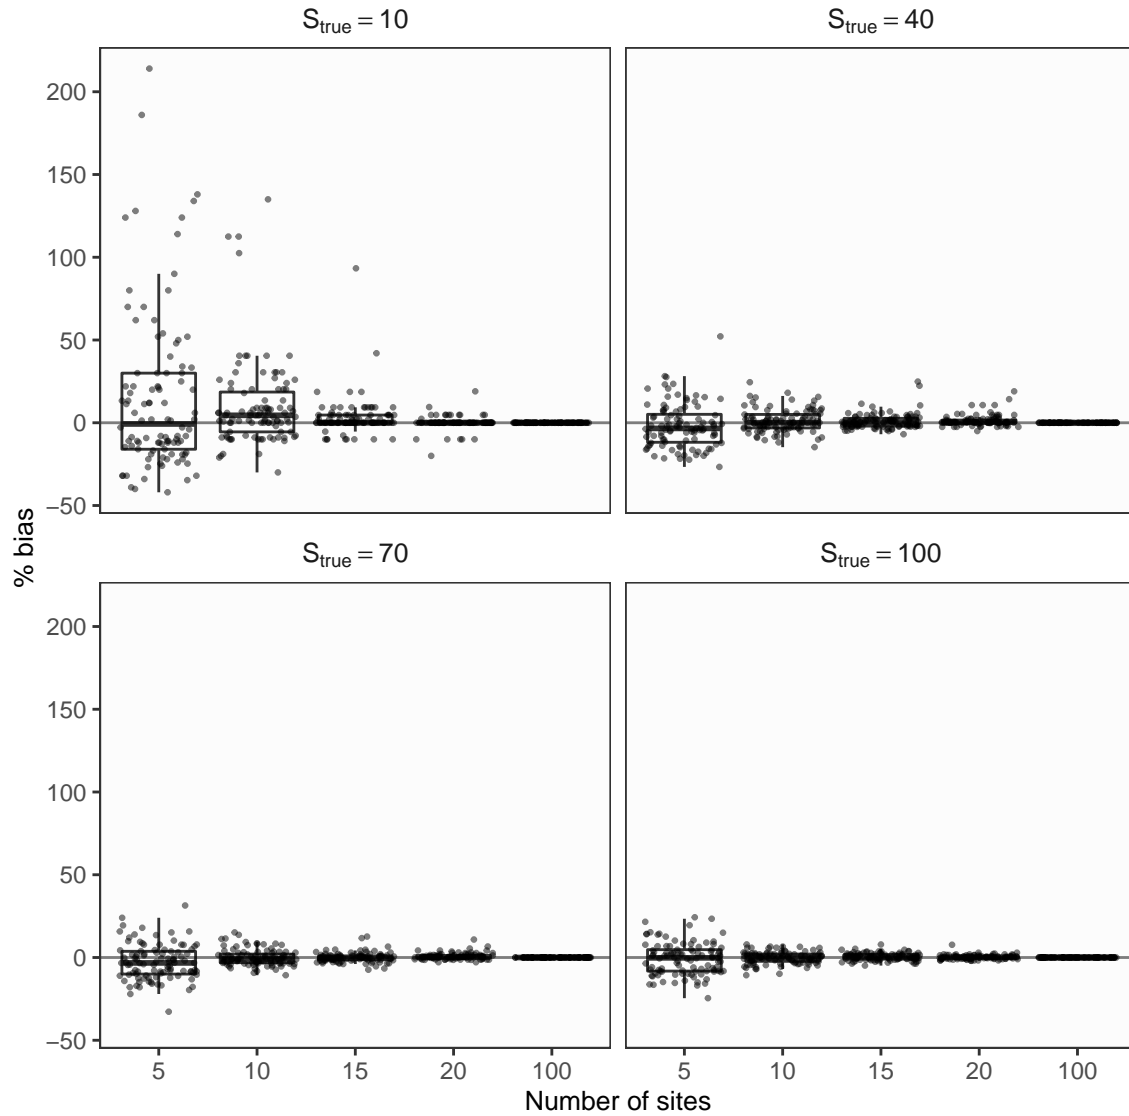

**Figure S20** Sensitivity analysis of asymptotic species richness in relation to true species richness  $S_{true}$  (panels) and the number of sampling sites  $N_{site}$  (x-axis). Positive values of % bias indicate an overestimation of species richness, while negative values indicate an underestimation. Different panels show results with different true species richness. The center lines are median values, the box boundaries 25 and 75 percentiles, and the whiskers 5 and 95 percentiles. Dots represent individual simulation replicates.

## References

1. R. M. McDowall, Fighting the flow: Downstream-upstream linkages in the ecology of diadromous fish faunas in West Coast New Zealand rivers. *Freshwater Biology* **40**, 111–122 (1998).
2. F. J. Rahel, W. A. Hubert, Fish assemblages and habitat gradients in a Rocky Mountain-Great Plains stream: Biotic zonation and additive patterns of community change. *Transactions of the American Fisheries Society* **120**, 319–332 (1991).
3. A. Terui, Y. Miyazaki, Three ecological factors influencing riverine fish diversity in the Shubuto River system, Japan: Habitat capacity, habitat heterogeneity and immigration. *Limnology* **17**, 143–149 (2016).
4. K. Bsemer, *et al.*, Headwaters are critical reservoirs of microbial diversity for fluvial networks. *Proceedings of the Royal Society B: Biological Sciences* **280**, 20131760 (2013).
5. E. Harvey, I. Gounand, A. Fronhofer Emanuel, F. Altermatt, Disturbance reverses classic biodiversity predictions in river-like landscapes. *Proceedings of the Royal Society B: Biological Sciences* **285**, 20182441 (2018).
6. U. S. Geological Survey and U.S. Department of Agriculture Natural Resources Conservation Service, Federal standards and procedures for the national watershed boundary dataset (WBD) (4 ed.): Techniques and Methods 11-A3 (2013).
7. T. C. Hsieh, K. H. Ma, A. Chao, iNEXT: An R package for rarefaction and extrapolation of species diversity (Hill numbers). *Methods in Ecology and Evolution* **7**, 1451–1456 (2016).
8. A. Gelman, I. Pardoe, Average predictive comparisons for models with nonlinearity, interactions, and variance components. *Sociological Methodology* **37**, 23–51 (2007).
